# Supplementary material for: Substantial and sustained improvement of serrated polyp detection after a simple educational intervention: results from a prospective controlled trial
Source: PubMed Central journal article supplement (PMC7677479; doi:10.1136/gutjnl-2019-319804), 2020-03-05
Supplement: gutjnl-2019-319804supp001.pdf [file gutjnl-2019-319804supp001.pdf]

# Serrated polyp awareness training

Supplementary material to manuscript entitled:  
*“Substantial and sustained improvement of serrated polyp detection after a simple educational intervention – Results from a prospective controlled trial”*

Arne GC Bleijenberg, Monique E. van Leerdam, Marloes Bigirwamungu-Bargeman, Jan Jacob Koornstra, Yasmijn J van Herwaarden, Manon C.W. Spaander, Silvia Sanduleanu, Barbara Bastiaansen, Erik J. Schoon, Niels van Lelyveld, Evelien Dekker, Joep EG IJspeert

# Optimizing the detection of colonic serrated polyps



- Colorectal cancer (CRC) arises from precursor lesions
- Resecting precursor lesions will prevent CRC
- Colonoscopy is the reference standard, but not perfect.....

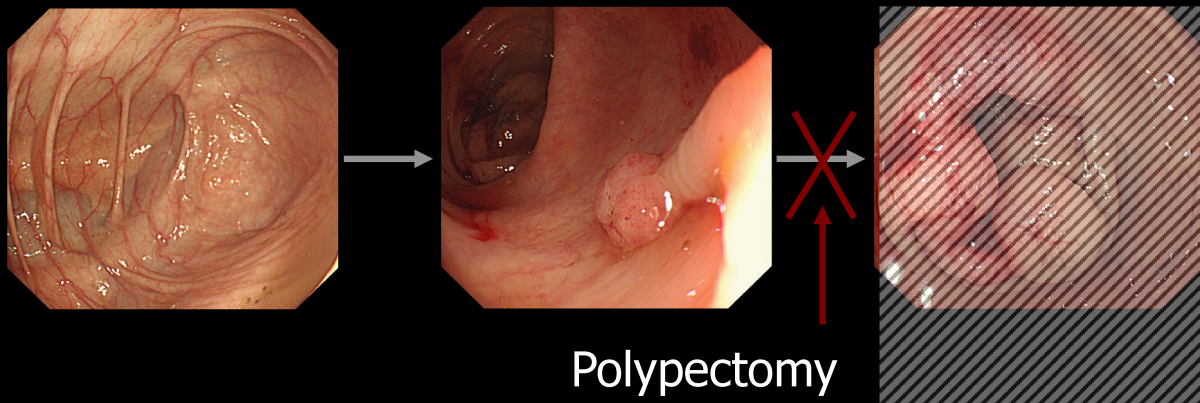

# Colonoscopy protects for left-sided..

*Table 3. Results of Primary Analysis: Odds Ratio for the Association Between Colonoscopy and Colorectal Cancer Death\**

| Model                              | Odds Ratio (95% CI) |                    |                   |                          |
|------------------------------------|---------------------|--------------------|-------------------|--------------------------|
|                                    | All Cancer          | Right-Sided Cancer | Left-Sided Cancer | Undefined Site of Cancer |
| <b>Attempted colonoscopy</b>       |                     |                    |                   |                          |
| None                               | 1.00                | 1.00               | 1.00              | 1.00                     |
| Any                                | 0.69 (0.63–0.74)    | 1.07 (0.94–1.21)   | 0.39 (0.34–0.45)  | 0.90 (0.75–1.08)         |
| <b>Completeness of colonoscopy</b> |                     |                    |                   |                          |
| None                               | 1.00                | 1.00               | 1.00              | 1.00                     |
| Complete                           | 0.63 (0.57–0.69)    | 0.99 (0.86–1.14)   | 0.33 (0.28–0.39)  | 0.90 (0.73–1.10)         |
| Incomplete                         | 0.91 (0.78–1.07)    | 1.35 (1.07–1.69)   | 0.63 (0.49–0.81)  | 0.91 (0.61–1.35)         |

\* Conditional logistic regression, adjusted for Charlson Comorbidity Index score.

.. but not for right-sided colorectal cancer

# Reasons for right-sided interval cancers:

---

- Inadequate quality of colonoscopy, e.g. no cecal intubation or insufficient bowel preparation
- Inadequate detection and resection of serrated polyps (SPs)

**Table 2.** Molecular characteristics of interval vs. non-interval cancers

|                          | Interval | Non-interval | <i>P</i> value |
|--------------------------|----------|--------------|----------------|
| <i>CIMP</i> <sup>a</sup> |          |              |                |
| Positive                 | 31 (57%) | 33 (33%)     | 0.004          |
| Negative                 | 23 (43%) | 75 (66%)     |                |

# Serrated polyps

|       | <b>Shape</b>          | <b>Mean Size</b>            | <b>Prevalence</b>   | <b>Location</b> | <b>Pre-cancerous</b> |
|-------|-----------------------|-----------------------------|---------------------|-----------------|----------------------|
| HP    | Flat, sessile         | Small, often $\leq 5$ mm    | Very common         | Left colon      | No                   |
| SSA/P | Flat, sessile         | Larger than HP <sup>a</sup> | Common <sup>b</sup> | Right colon     | Yes                  |
| TSA   | Sessile, pedunculated | Larger than HP              | Rare                | Left colon      | Yes                  |

Rex et al. Am J Gastroenterol 2012; 107:1315–1329

# Prevalence of SPs

% of asymptomatic patients with at least 1 SP:

HP 23.8 %

SSA/P 4.8%

SSA/P +D 1.5%

TSA 0.1%

|                                                        | Prevalence                          |
|--------------------------------------------------------|-------------------------------------|
|                                                        | <b>Total (n = 1426)<sup>1</sup></b> |
| <b>At least 1 serrated polyp, n (%)</b>                | <b>388 (27.2)</b>                   |
| Hyperplastic polyp                                     | 339 (23.8)                          |
| SSA/P                                                  | 68 (4.8)                            |
| TSA                                                    | 1 (0.1)                             |
| <b>At least 1 proximal serrated polyp, n (%)</b>       | <b>174 (12.2)</b>                   |
| Proximal hyperplastic polyp                            | 127 (8.9)                           |
| Proximal SSA/P                                         | 51 (3.6)                            |
| Proximal TSA                                           | 0.0 (0.0)                           |
| <b>At least 1 serrated polyp ≥ 10 mm, n (%)</b>        | <b>37 (2.6)</b>                     |
| Hyperplastic polyp ≥ 10 mm                             | 22 (1.5)                            |
| SSA/P ≥ 10 mm                                          | 16 (1.1)                            |
| TSA ≥ 10 mm                                            | 0.0 (0.0)                           |
| <b>At least 1 serrated polyp with dysplasia, n (%)</b> | <b>22 (1.5)</b>                     |
| SSA/P with dysplasia                                   | 21 (1.5)                            |
| TSA with dysplasia                                     | 1 (0.1)                             |

# Prevalence of SSA/P

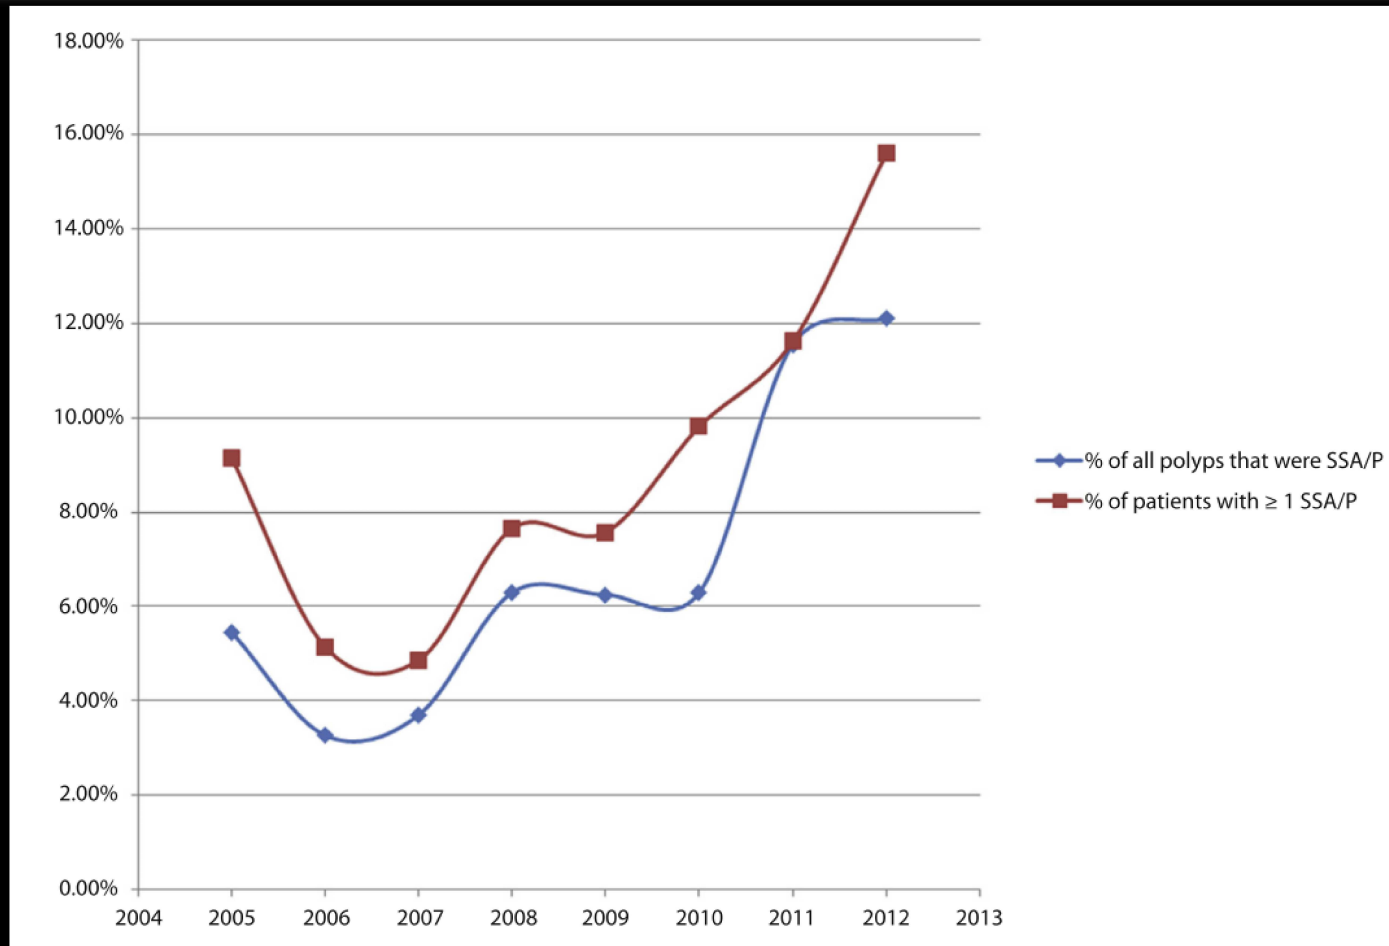

Abdeljawad et al. GIE 2014

# SSA/P more often located in right-sided colon

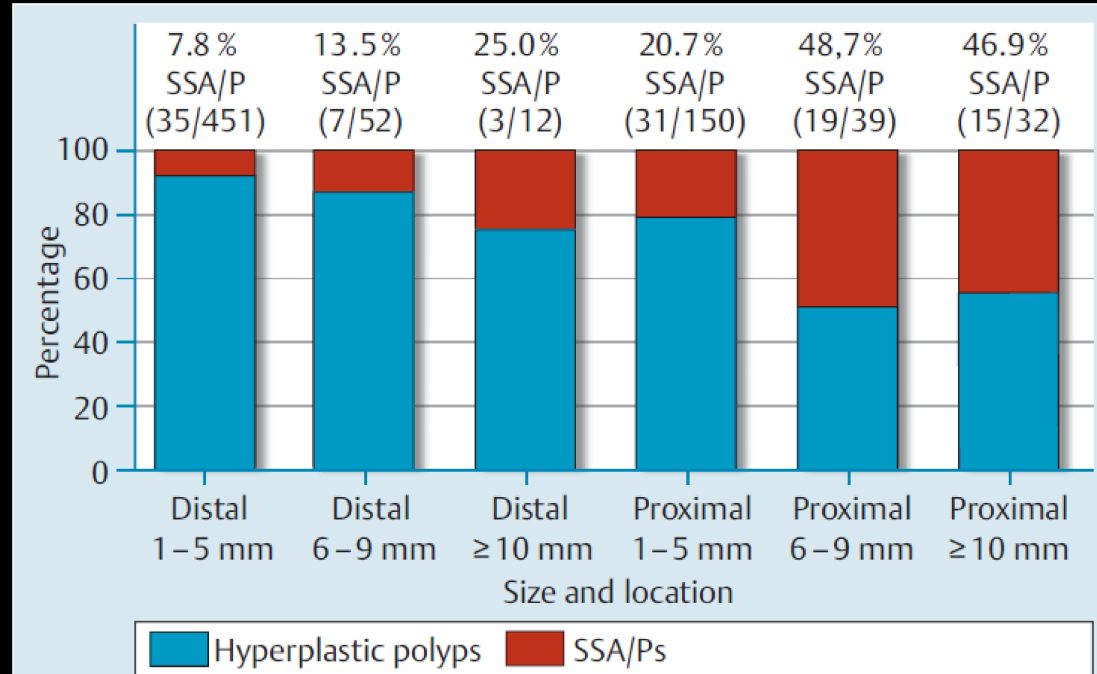

**Fig. 1** Ratio between hyperplastic polyps and sessile serrated adenoma/polyp (SSA/P) histology stratified per size group and colonic location.

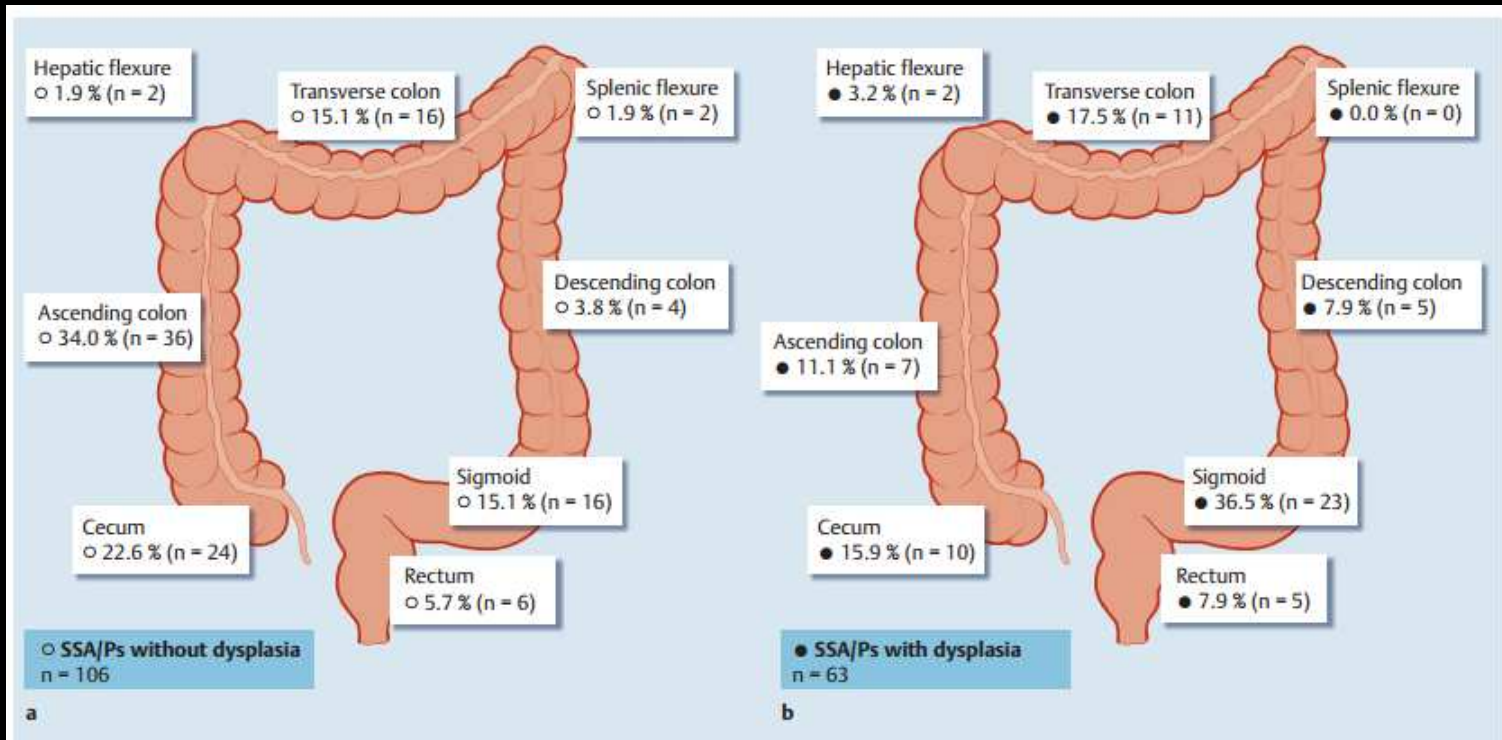

BUT...

SSA/P with dysplasia located throughout the colon??



# Inadequate detection of SPs

| Endoscopist | Number of colonoscopies | Patient age <sup>a</sup> | Male | ≥1 Adenoma | ≥1 Proximal serrated polyp |
|-------------|-------------------------|--------------------------|------|------------|----------------------------|
| 1           | 3189                    | 59.8 ± 8.0               | 52%  | 47%        | 18%                        |
| 2           | 154                     | 57.8 ± 8.0               | 45%  | 31%        | 10%                        |
| 3           | 532                     | 57.4 ± 7.3               | 45%  | 33%        | 6%                         |
| 4           | 109                     | 58.2 ± 7.0               | 46%  | 39%        | 11%                        |
| 5           | 331                     | 57.4 ± 6.9               | 48%  | 40%        | 13%                        |
| 6           | 124                     | 58.4 ± 6.9               | 44%  | 33%        | 8%                         |
| 7           | 528                     | 58.9 ± 7.7               | 41%  | 31%        | 11%                        |
| 8           | 56                      | 59.2 ± 7.6               | 50%  | 46%        | 13%                        |
| 9           | 348                     | 57.7 ± 7.5               | 37%  | 36%        | 12%                        |
| 10          | 359                     | 57.7 ± 7.3               | 53%  | 25%        | 3%                         |
| 11          | 90                      | 57.7 ± 6.7               | 52%  | 17%        | 1%                         |
| 12          | 83                      | 59.1 ± 8.3               | 52%  | 27%        | 2%                         |
| 13          | 327                     | 58.1 ± 7.8               | 60%  | 29%        | 11%                        |
| 14          | 297                     | 59.5 ± 8.2               | 50%  | 21%        | 4%                         |
| 15          | 154                     | 57.8 ± 8.0               | 45%  | 31%        | 10%                        |
| Combined    | 6681                    | 58.9 ± 7.8               | 49%  | 38%        | 13%                        |

# Inadequate detection of SPs

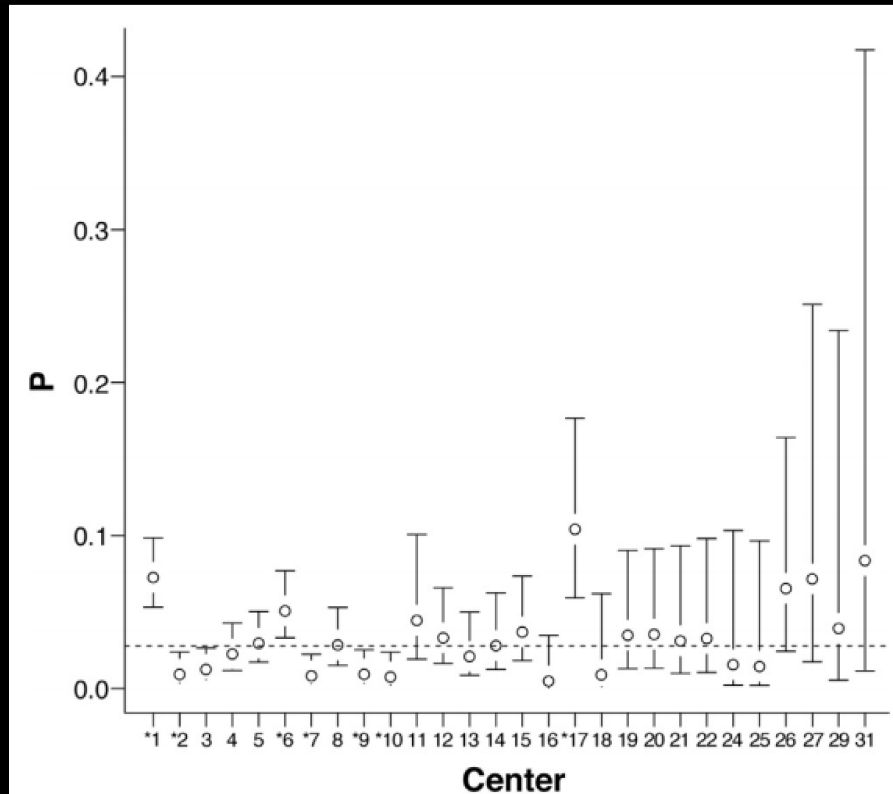

**Figure 1.** Prevalence rates of proximal serrated lesions in 31 centers. The vertical axis (*P*) is the fraction of patients with 1 or more proximal serrated lesions. The average detection rate of 2.8% is designated by the *hashed line*.

# How to improve serrated polyp detection?

---

- Improve awareness of malignant potential of SPs
- Improve knowledge of the subtle SP features: know what you are looking for!
- Ensure a high quality colonoscopy
- Use advanced imaging techniques for improved surveillance in case of uncertainty

# Malignant potential of SPs

± 20-30% of CRC arises from SPs

Pathogenesis via serrated neoplasia pathway

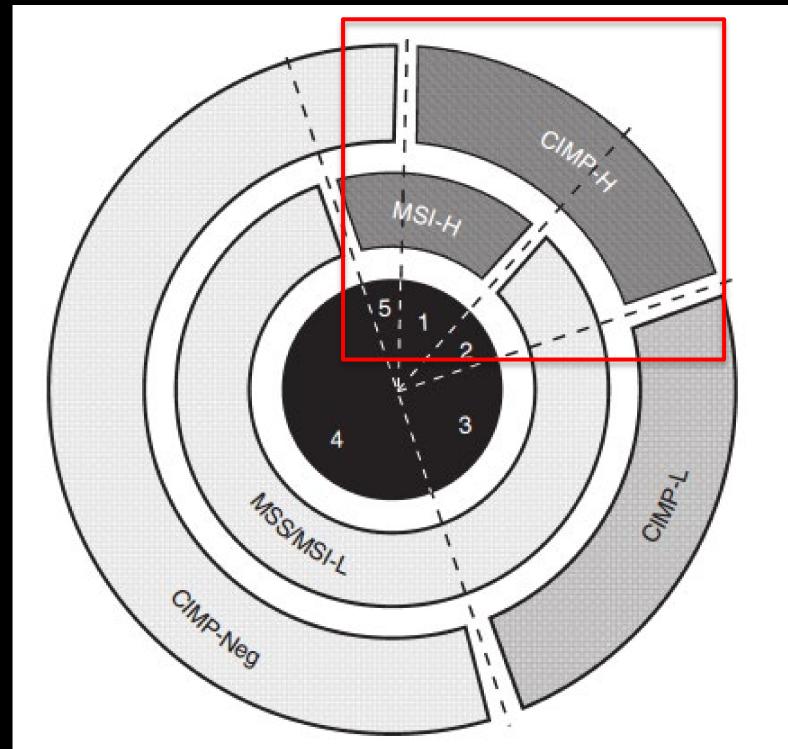

# Serrated neoplasia pathway

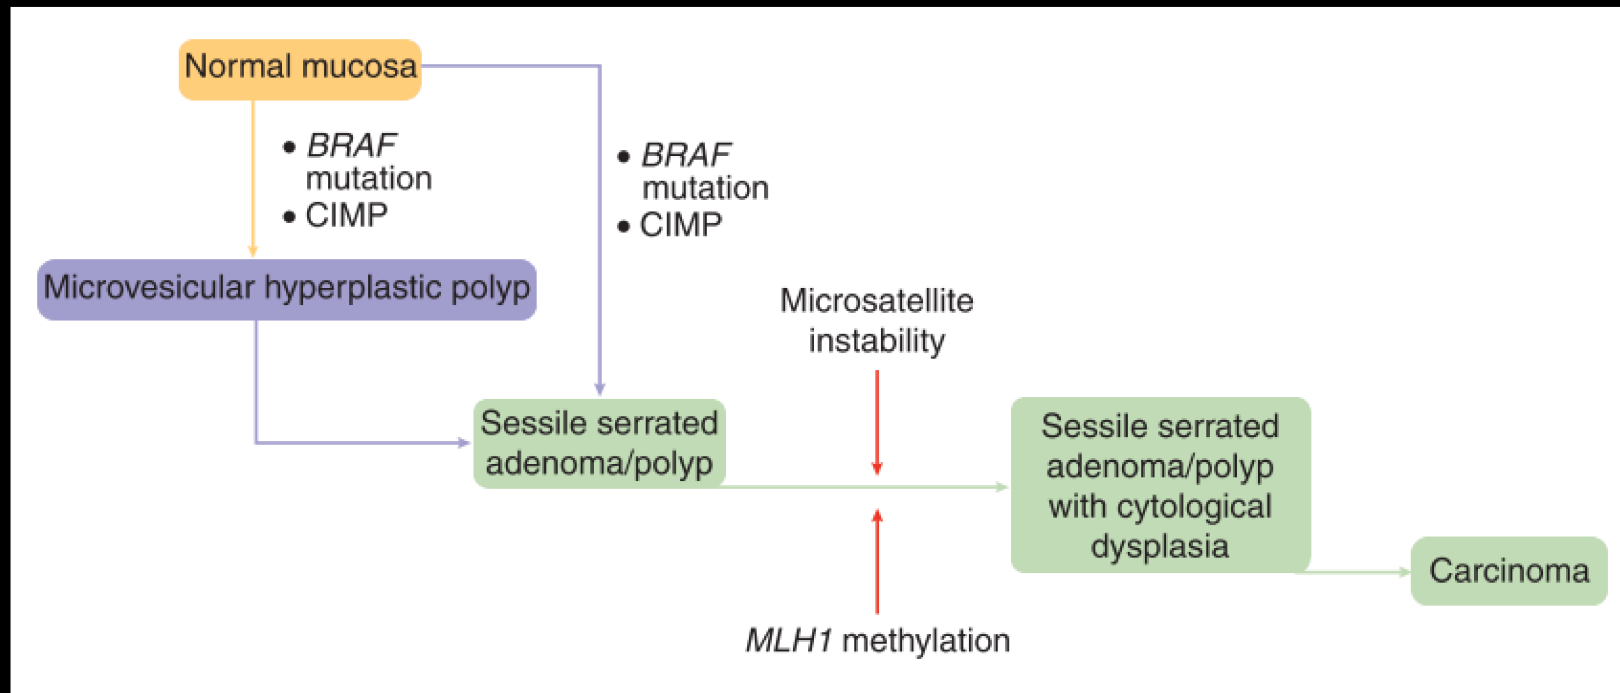

# Why are serrated polyps easily missed?

## Subtle features of SPs:

- Flat or sessile morphology
- Same color as mucosal wall
- Vague borders

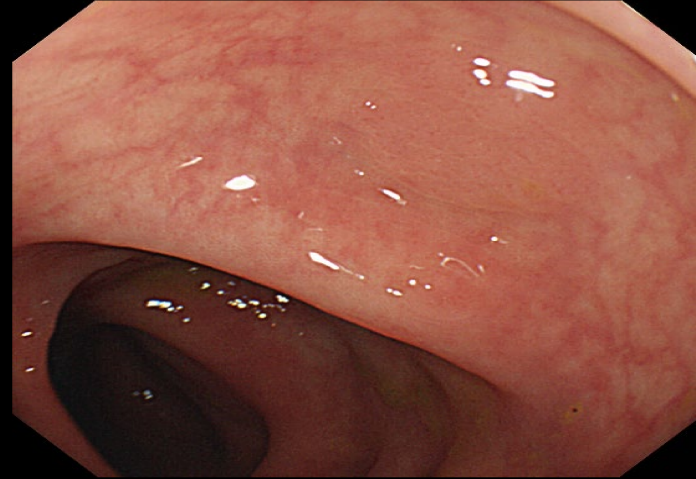

Knowledge of SP features will improve detection!

# Know what to look for!

---

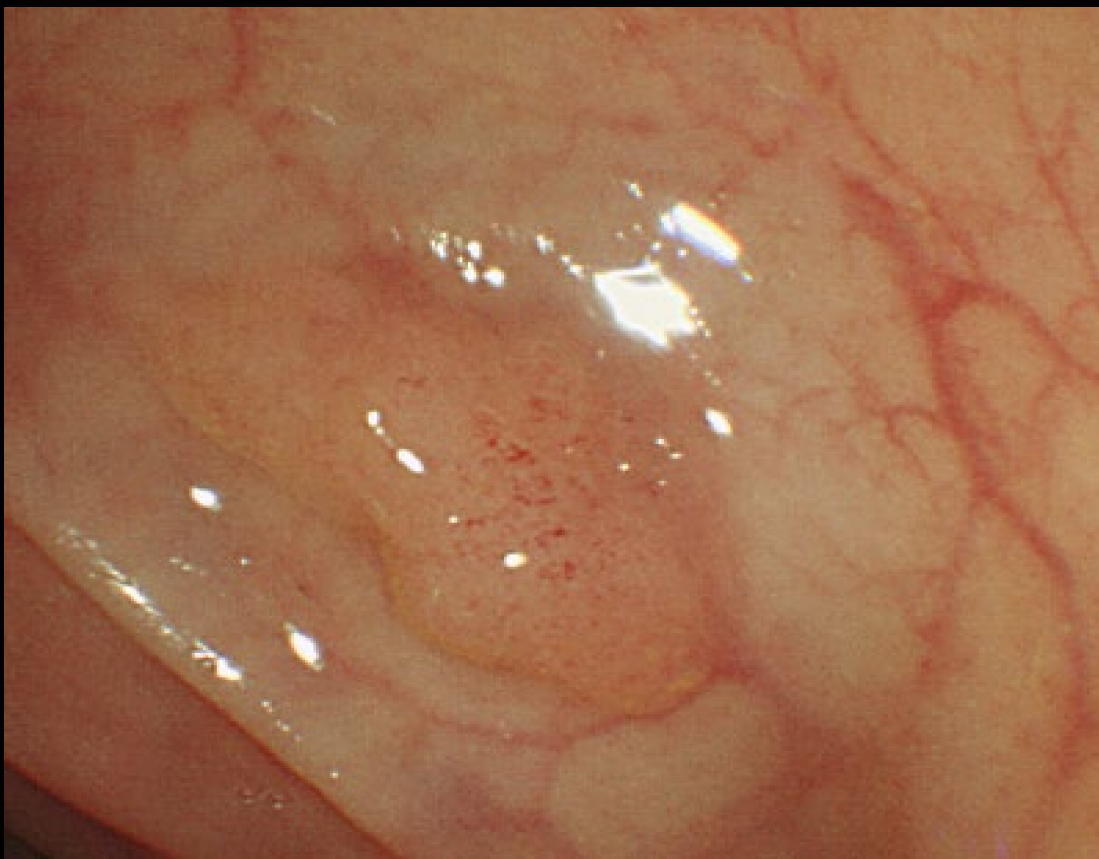

# Know what to look for!

---

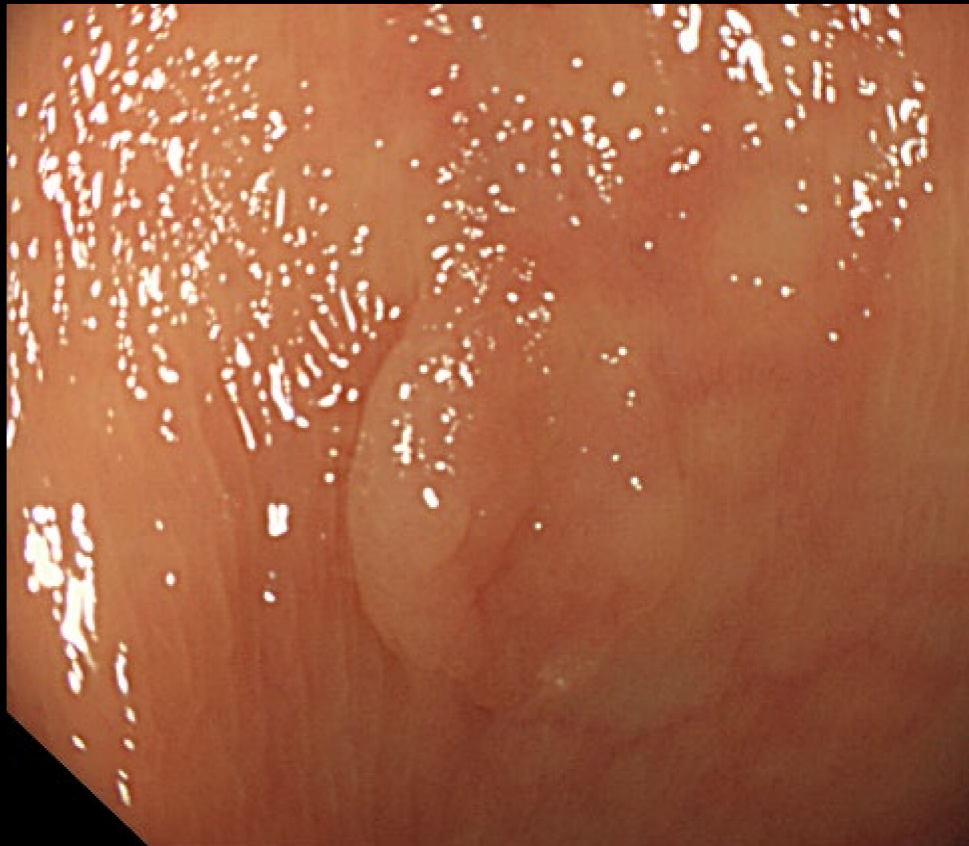



# Know what to look for!

---

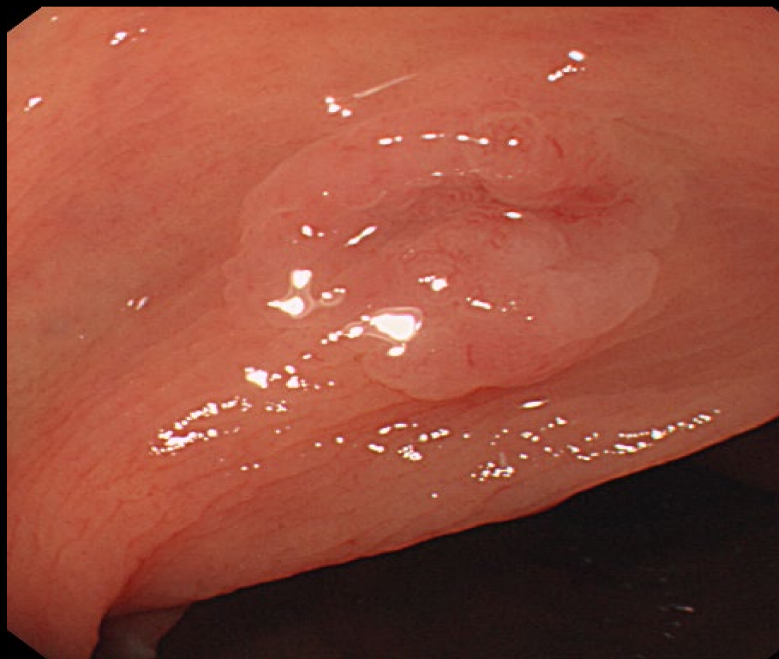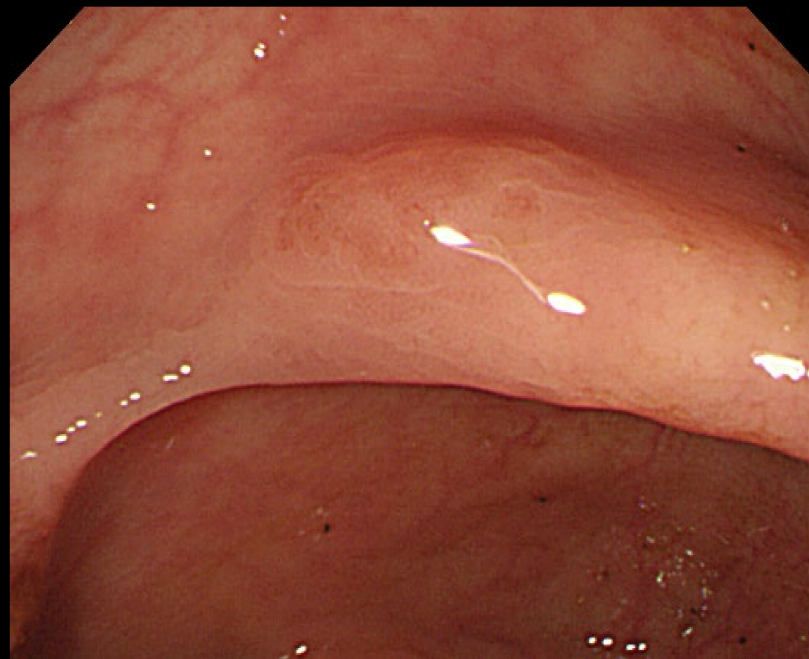

# Optimizing the characterization of colonic serrated polyps

# Characterizing SSA/P

---

|         | SSA/P                        | HP/Adenoma                      |
|---------|------------------------------|---------------------------------|
| Surface | Clouded                      | Smooth                          |
| Borders | Indistinct (vague)           | Sharp demarcated                |
| Shape   | Irregular                    | Symmetric                       |
| Crypts  | Dark spots inside the crypts | No dark spots inside the crypts |

# WASP classification: 2-step differentiation

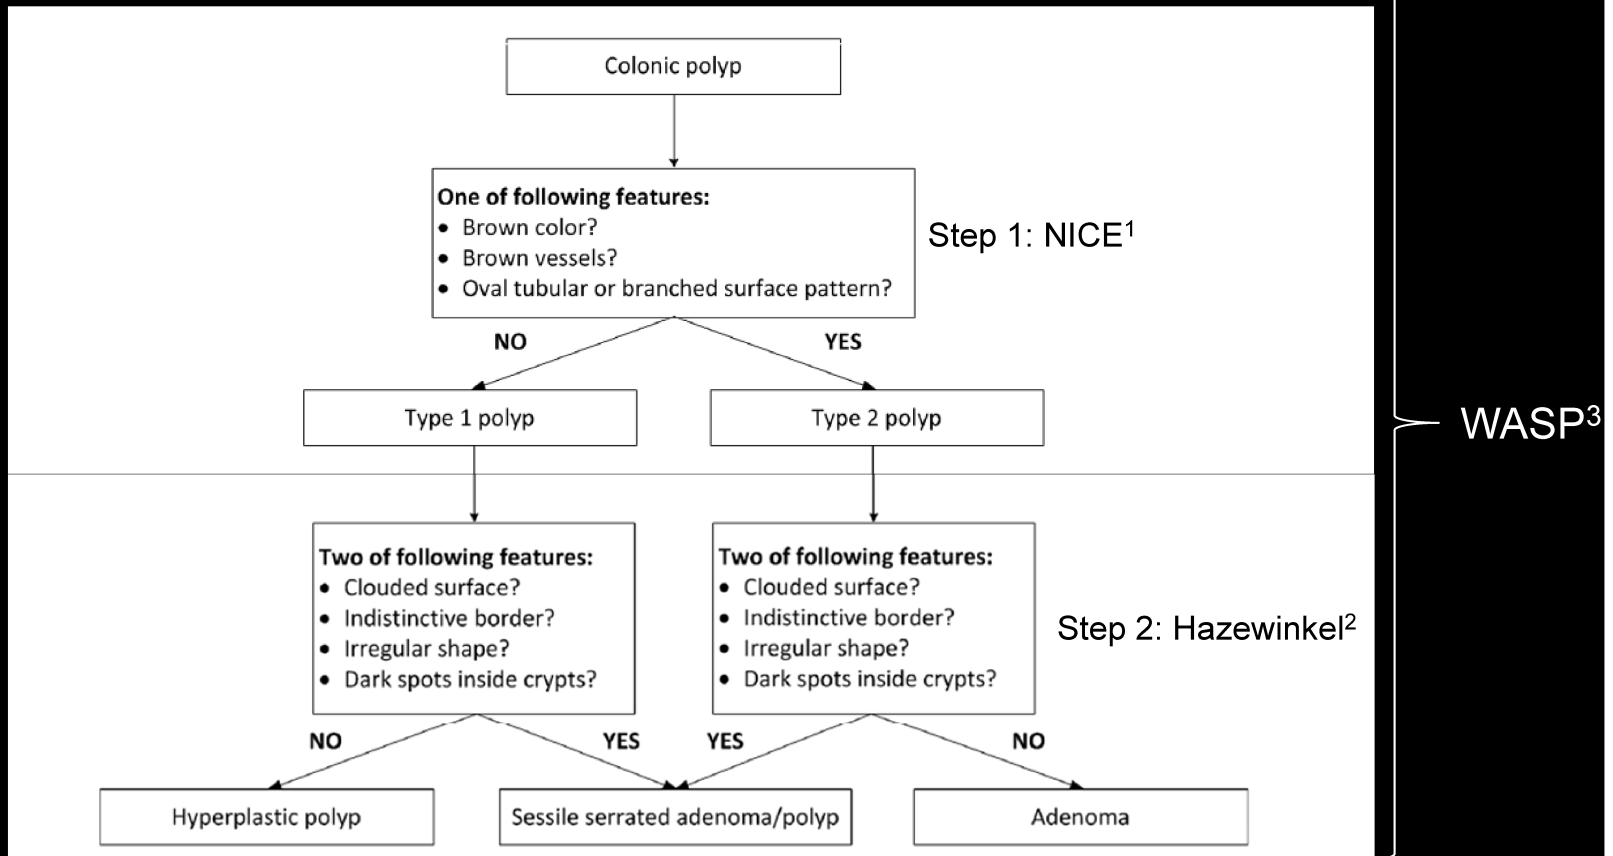

1: Rex et al., *Gastroenterology* 2012

2: Hazewinkel et al., *GIE* 2013

3: IJspeert et al., *Gut* 2016

# STEP 1: NICE CLASSIFICATION

# Characteristic 1: Color

---

Hyperplastic polyp

Same or lighter than  
background

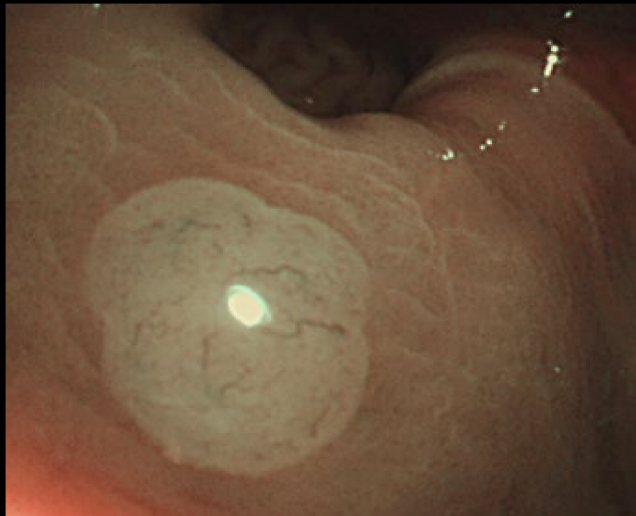

Adenoma

Browner relative to  
background

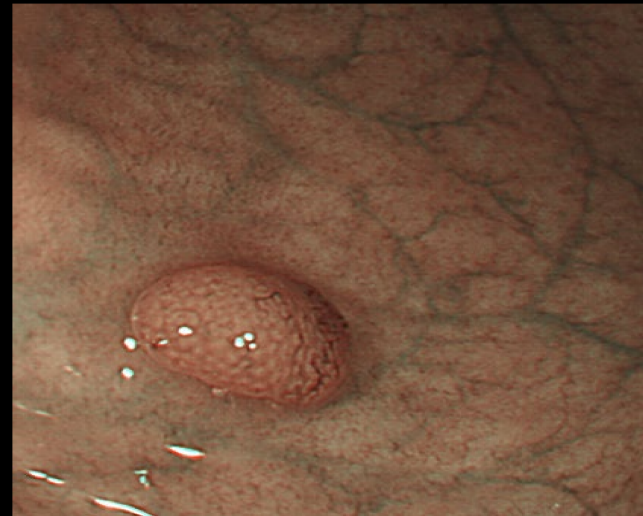

## Characteristic 2: Vessels

---

Hyperplastic polyp

None, or isolated lacy vessels

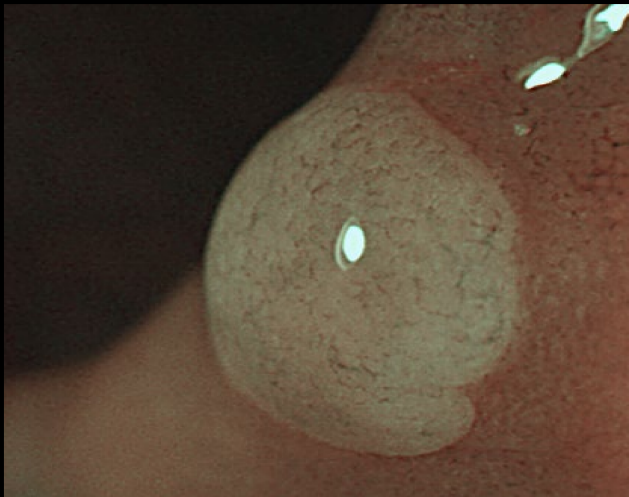

Adenoma

Brown vessels surrounding white structures

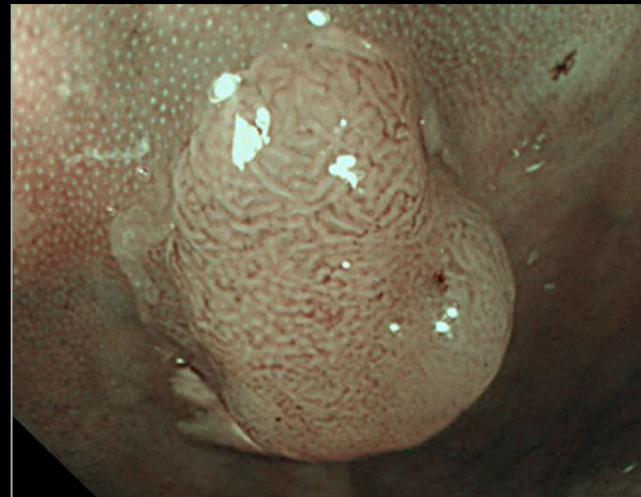

## Characteristic 3: Surface pattern

### Hyperplastic polyp

Dark or white spots of uniform size, or homogenous absence of pattern

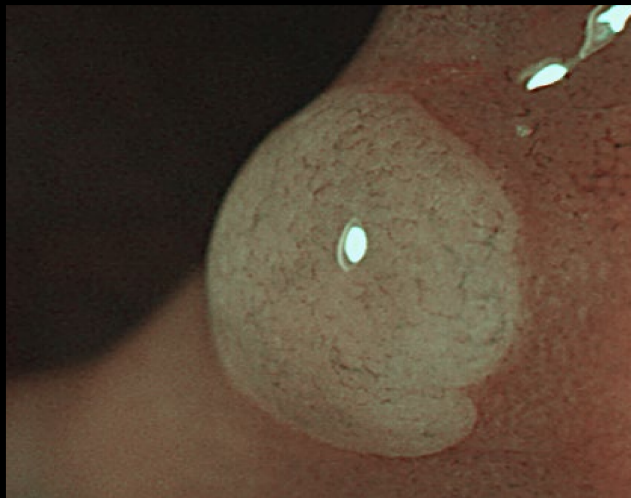

### Adenoma

Oval, tubular or brached white structures surrounded by brown vessels

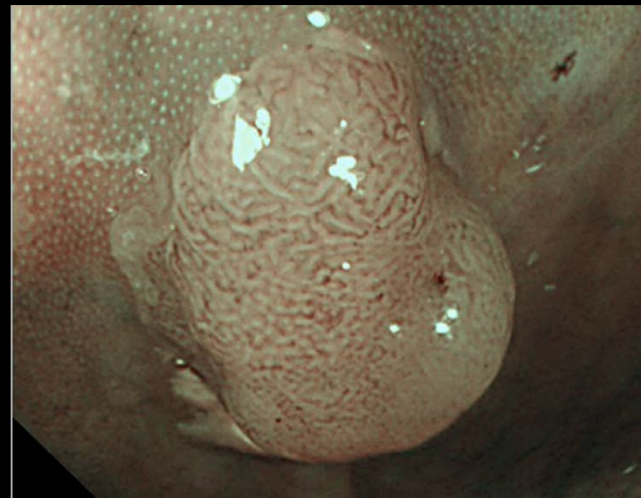



# **STEP 2: HAZEWINKEL CLASSIFICATION**

# Characteristic 1: Surface

---

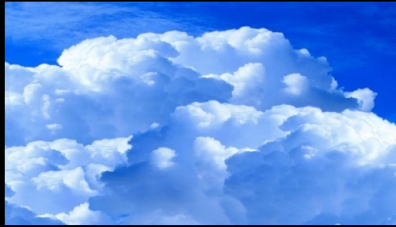

Sessile serrated  
adenoma/polyp  
Clouded surface

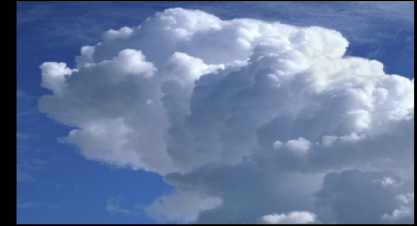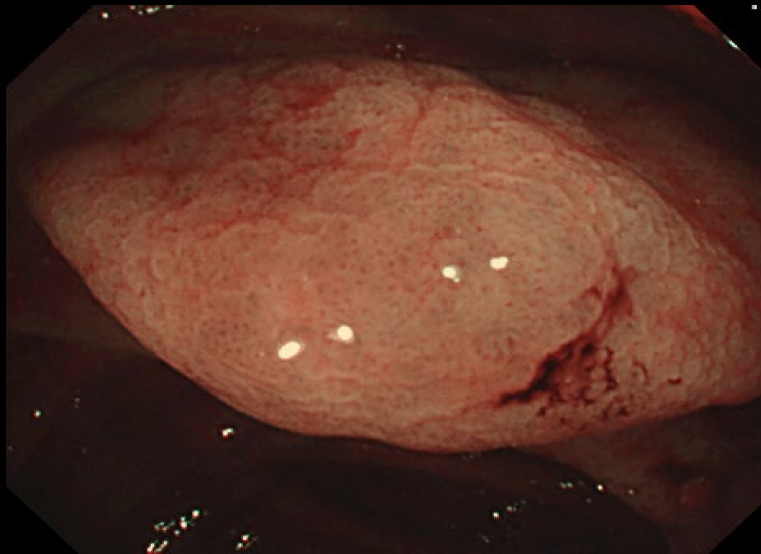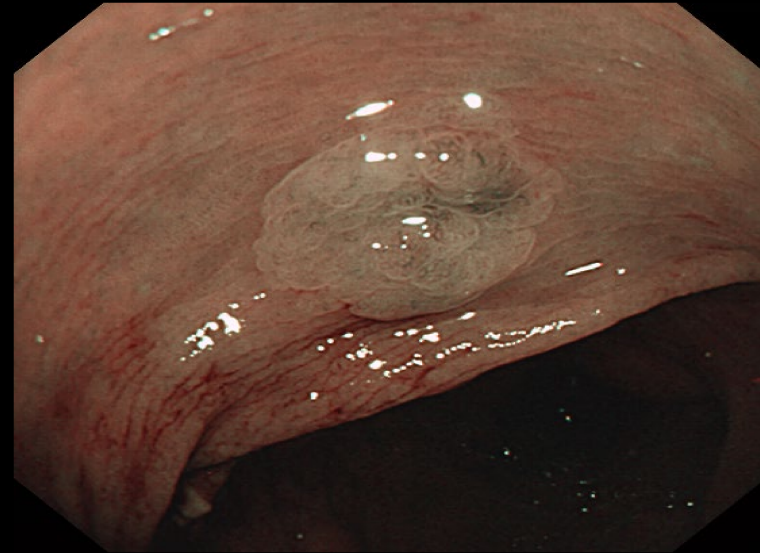

# Characteristic 1: Surface

Hyperplastic polyp

Smooth surface

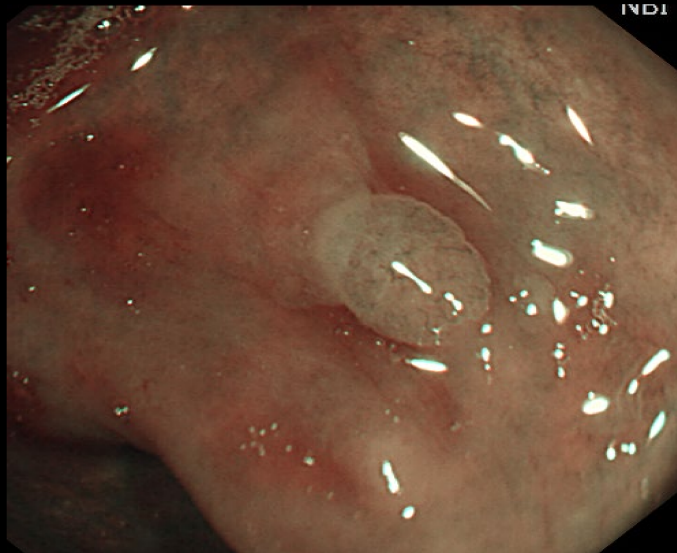

Adenoma

Smooth surface

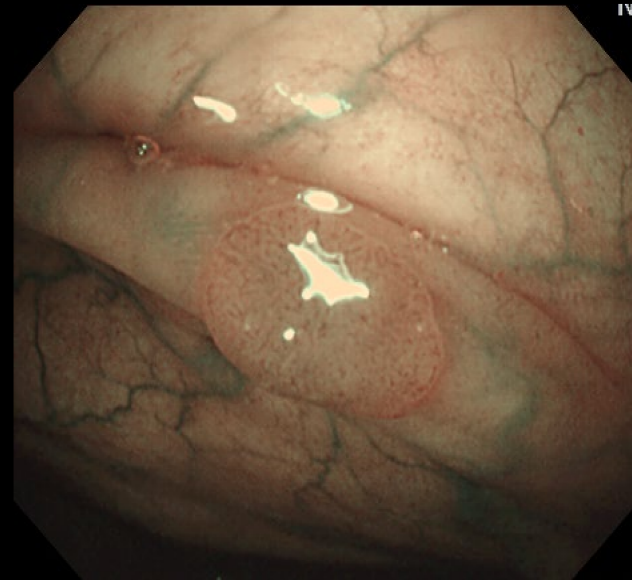

## Characteristic 2: Border

---

Sessile serrated adenoma/polyp  
Indistinct (vague) border

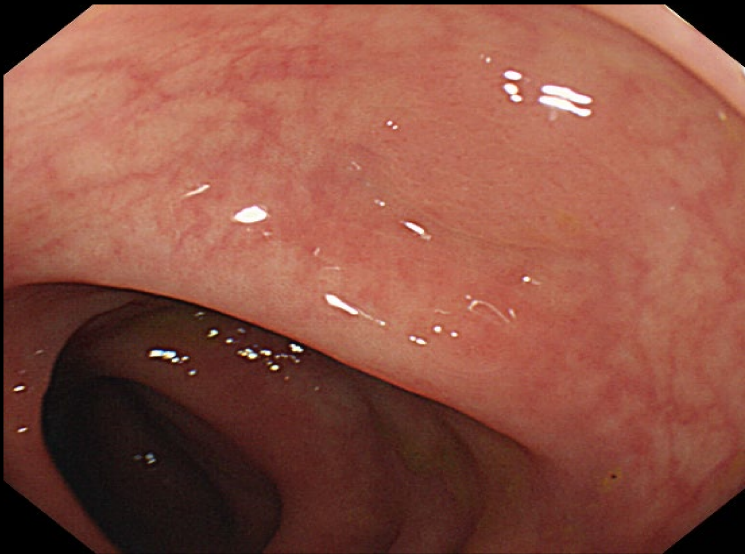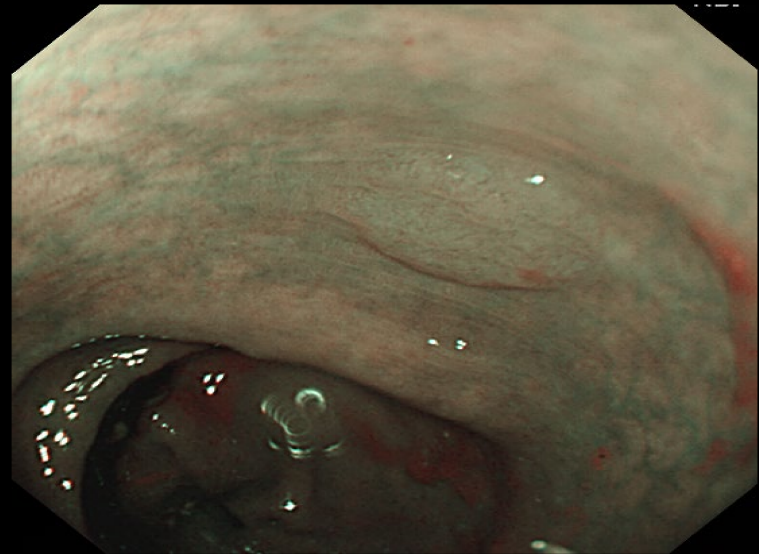

## Characteristic 2: Border

---

Hyperplastic polyp

Sharp demarcated border

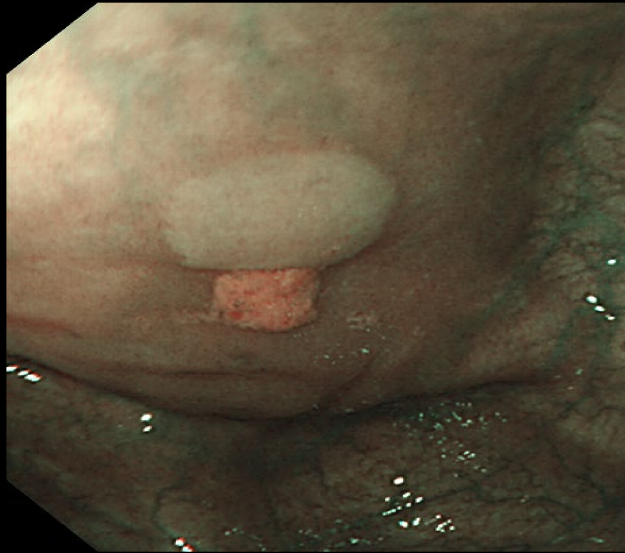

Adenoma

Sharp demarcated border

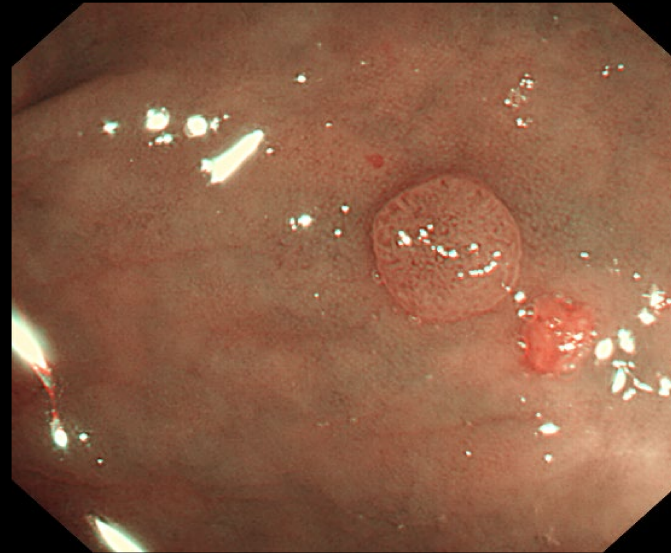



# Characteristic 3: Shape

---

Sessile serrated  
adenoma/polyp  
Irregular shape

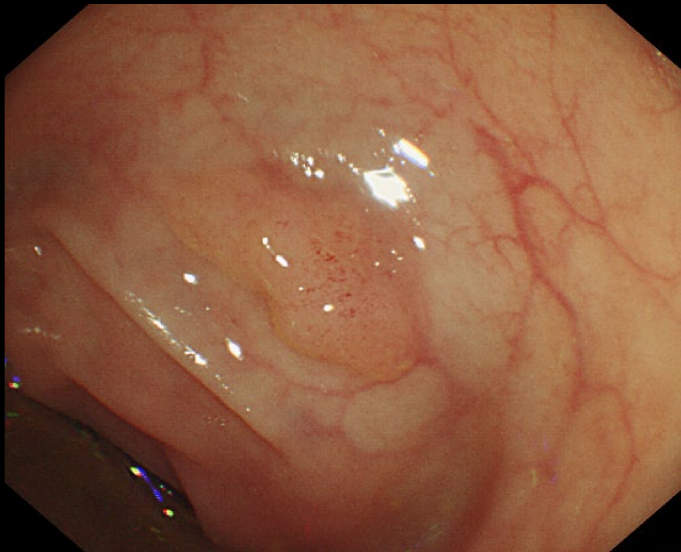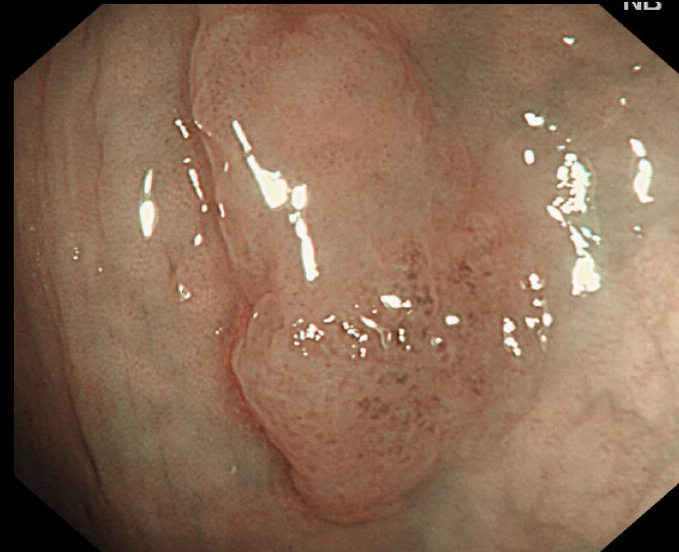

# Characteristic 3: Shape

---

Hyperplastic polyp

Symmetric shape

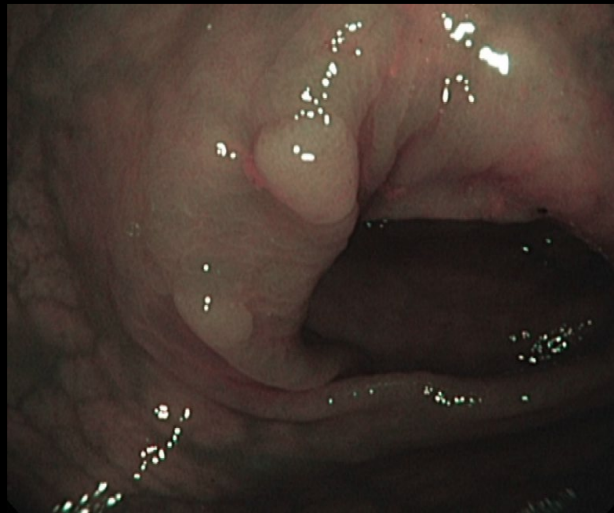

Adenoma

Symmetric shape

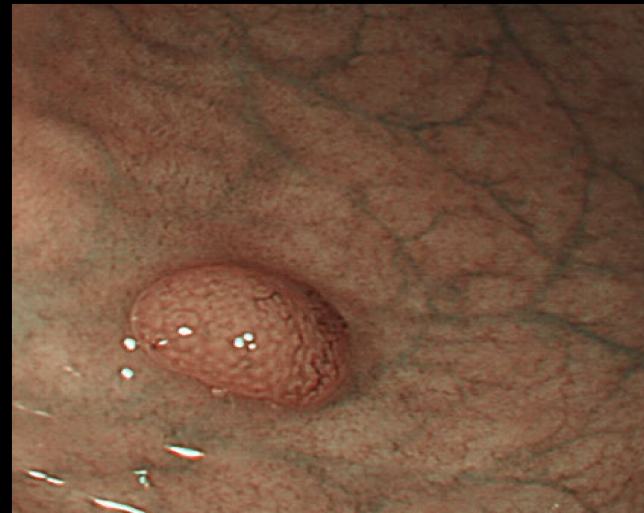

# Characteristic 4: Crypts

---

Sessile serrated  
adenoma/polyp

Dark spots inside the crypts

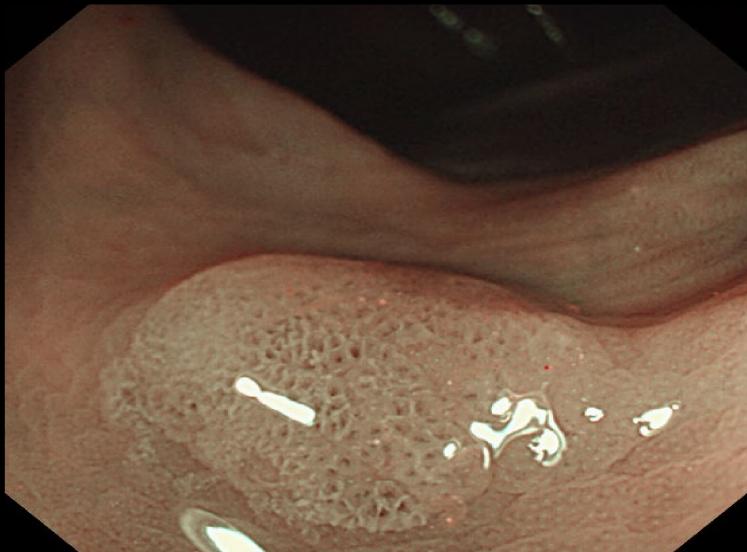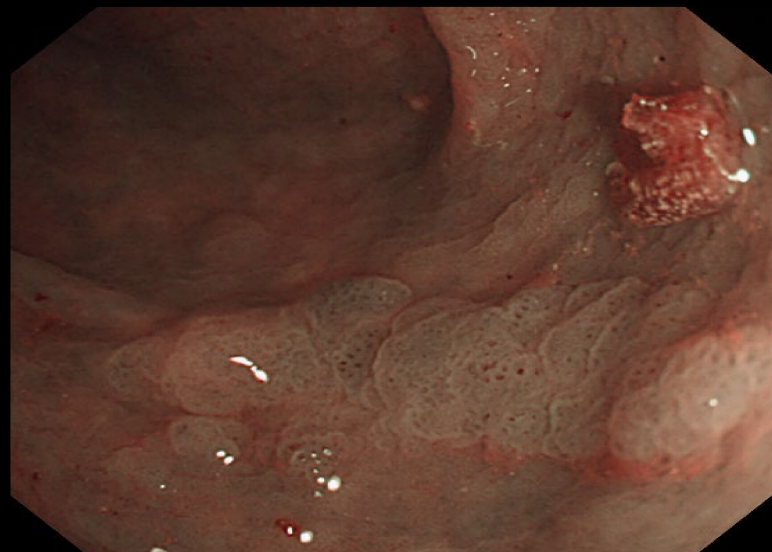



# Characteristic 4: Crypts

---

Hyperplastic polyp

No dark spots inside the crypts



Adenoma

No dark spots inside the crypts

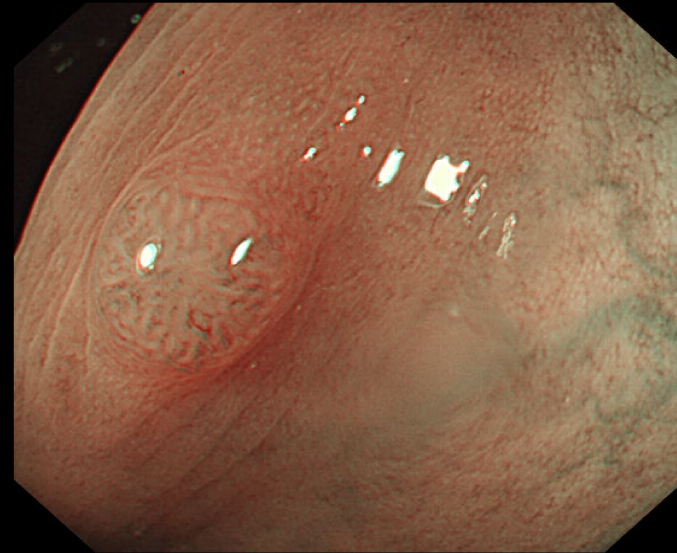

# Example 1

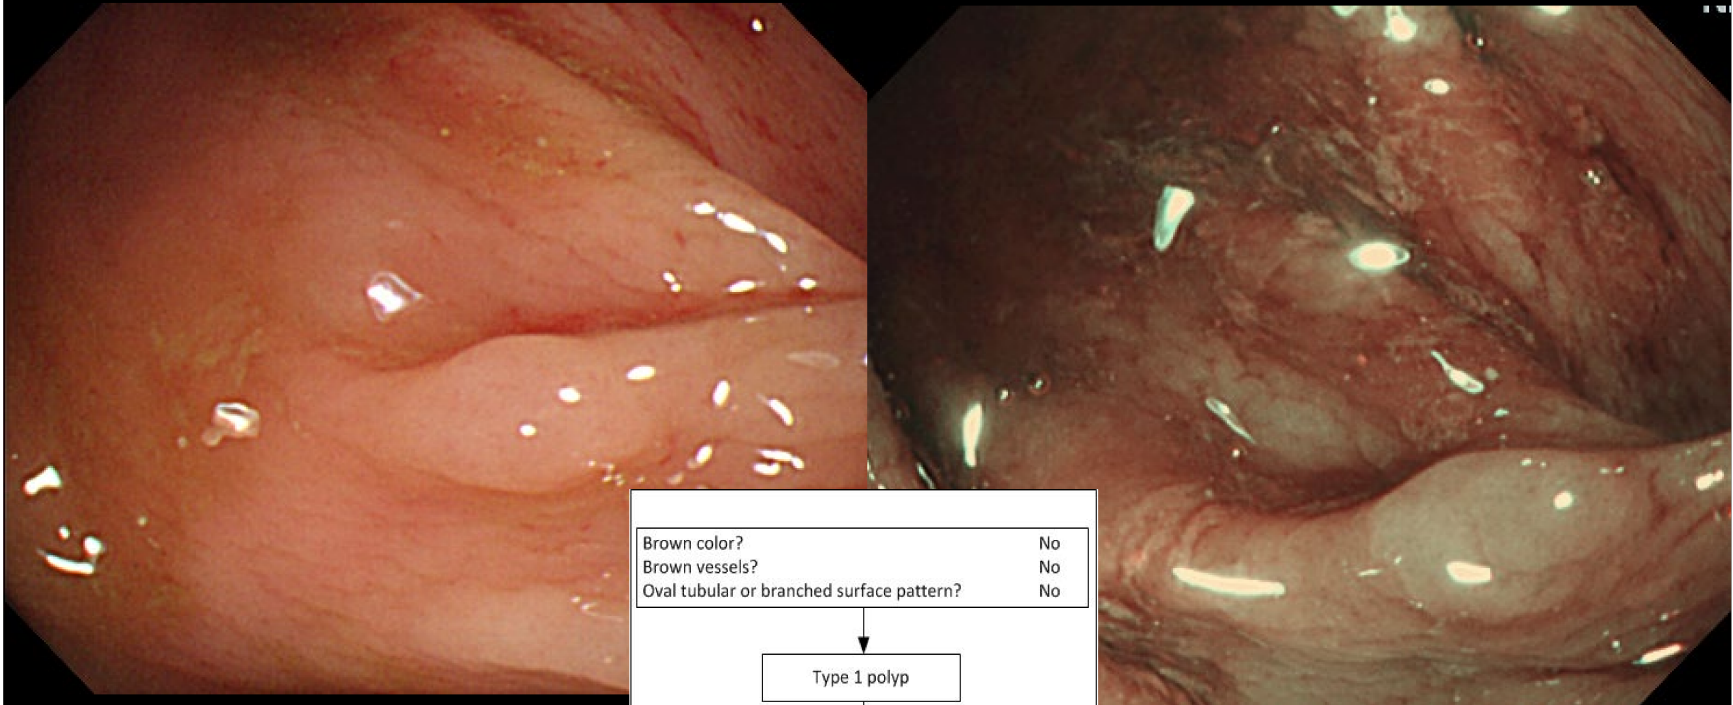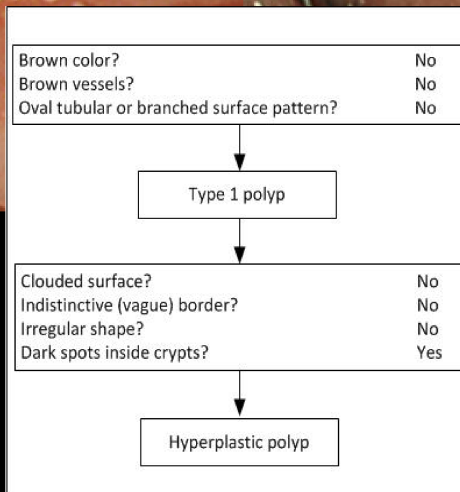

# Example 2

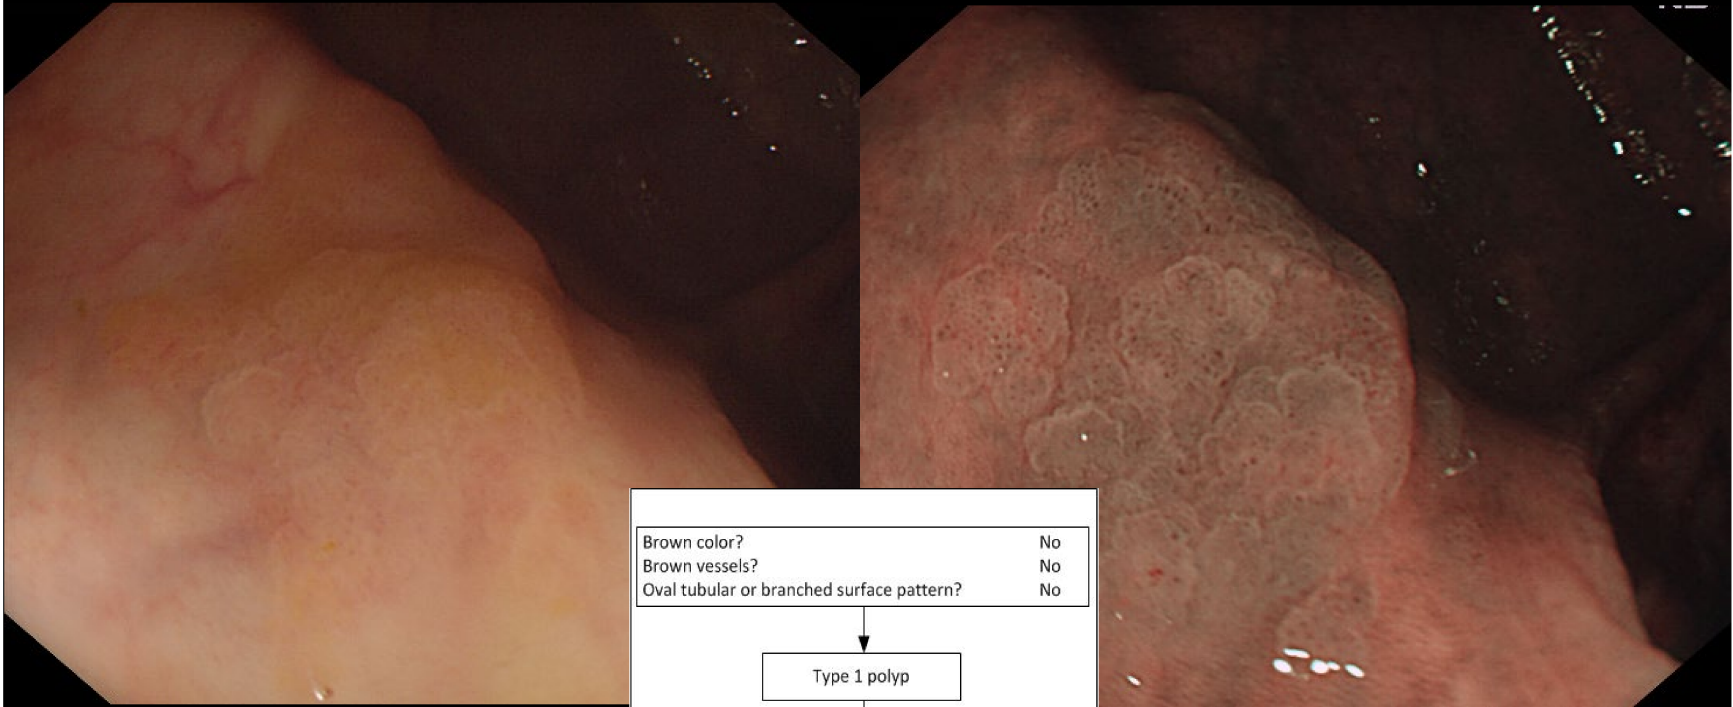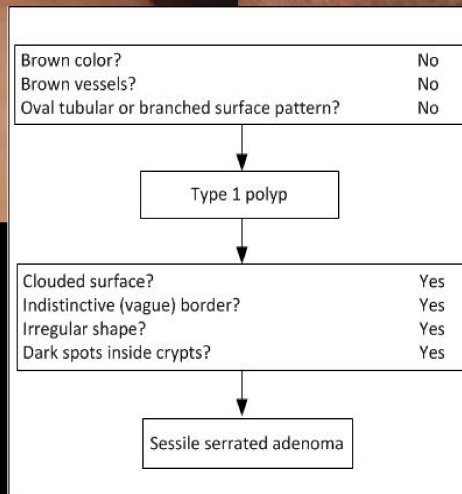



# Example 3

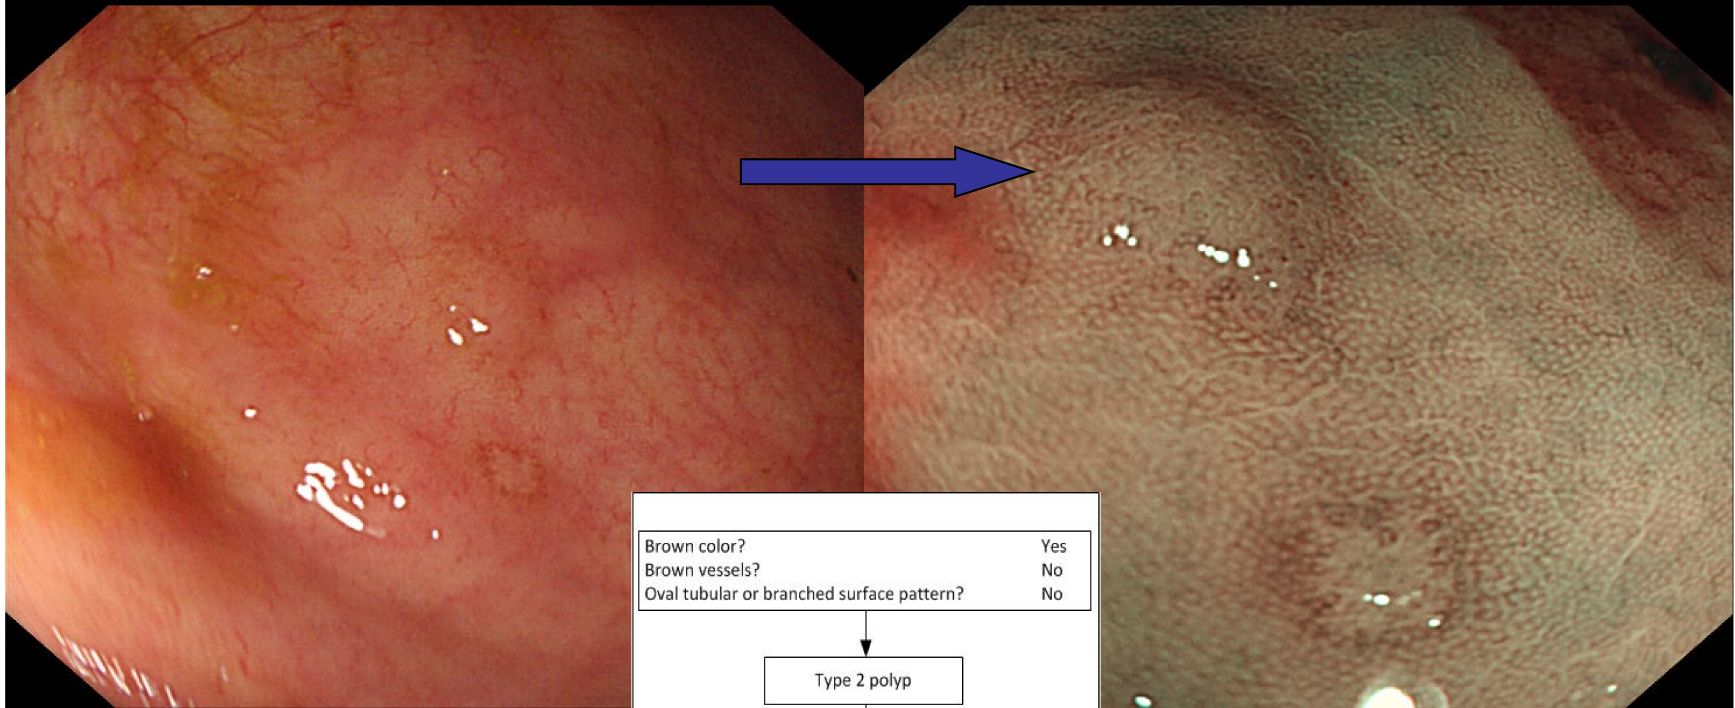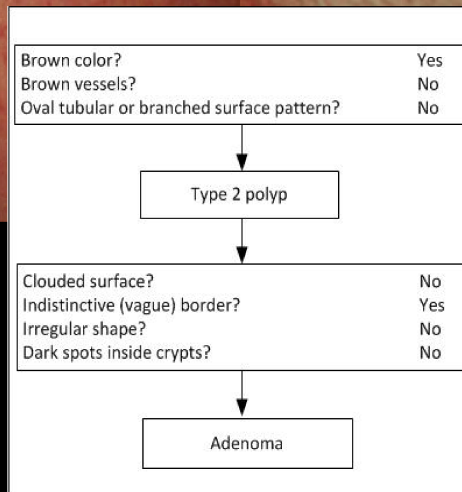

# How to improve serrated polyp detection?

---

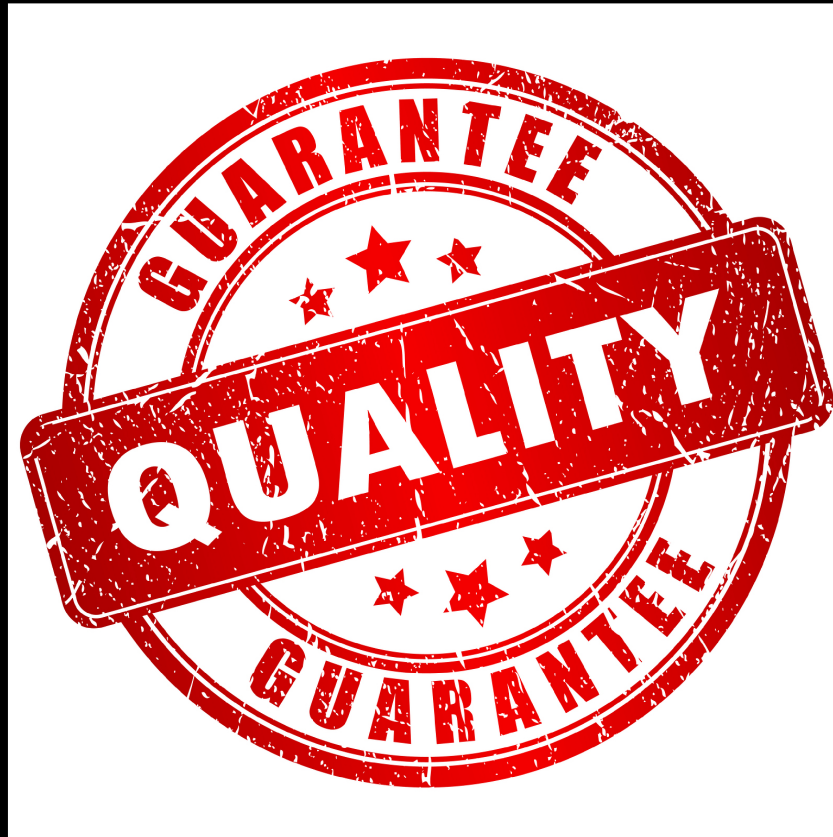

Ensure a high quality colonoscopy!

# Quality of bowel preparation

---

- Mucus-cap of SP attracts stool causing difficulties in detection
- In clean colon the mucus-cap can help to identify SPs

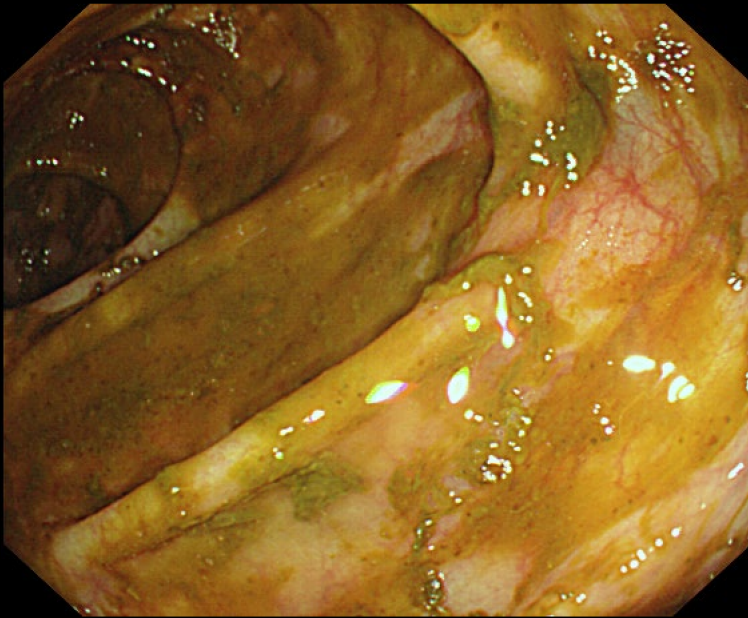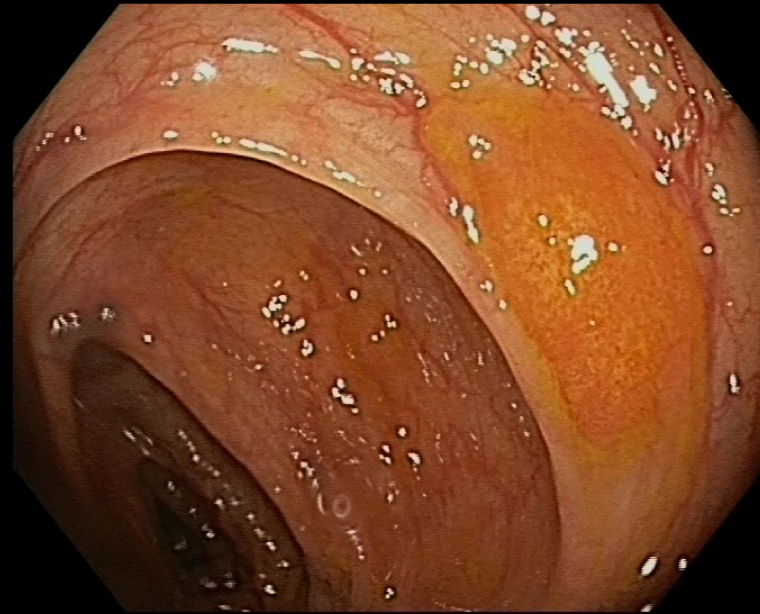

# Know what to look for!

---

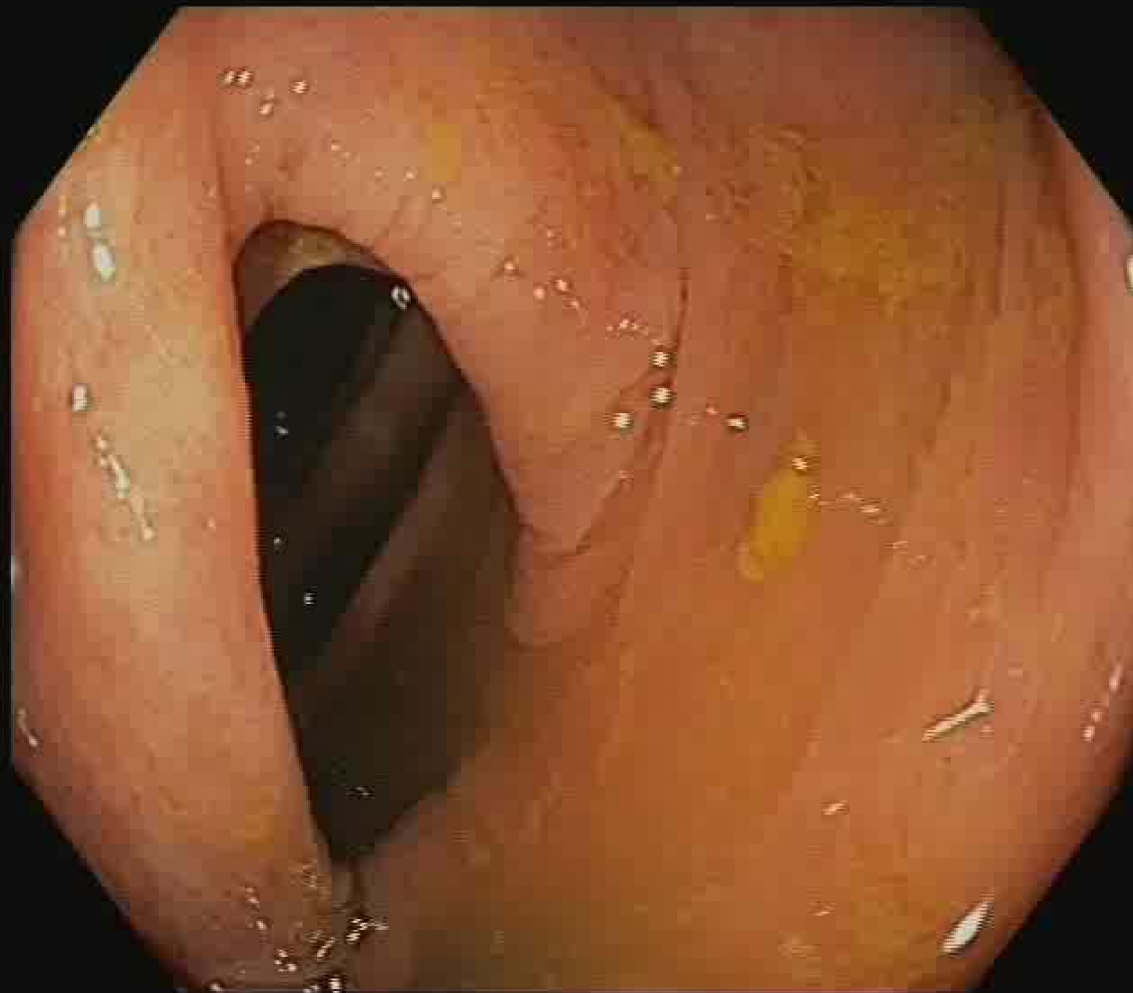



# Cecal intubation

---

- SSA/P are more often located in the proximal colon
- Incomplete colonoscopy will result in substantial amount of missed SPs and subsequent interval CRC

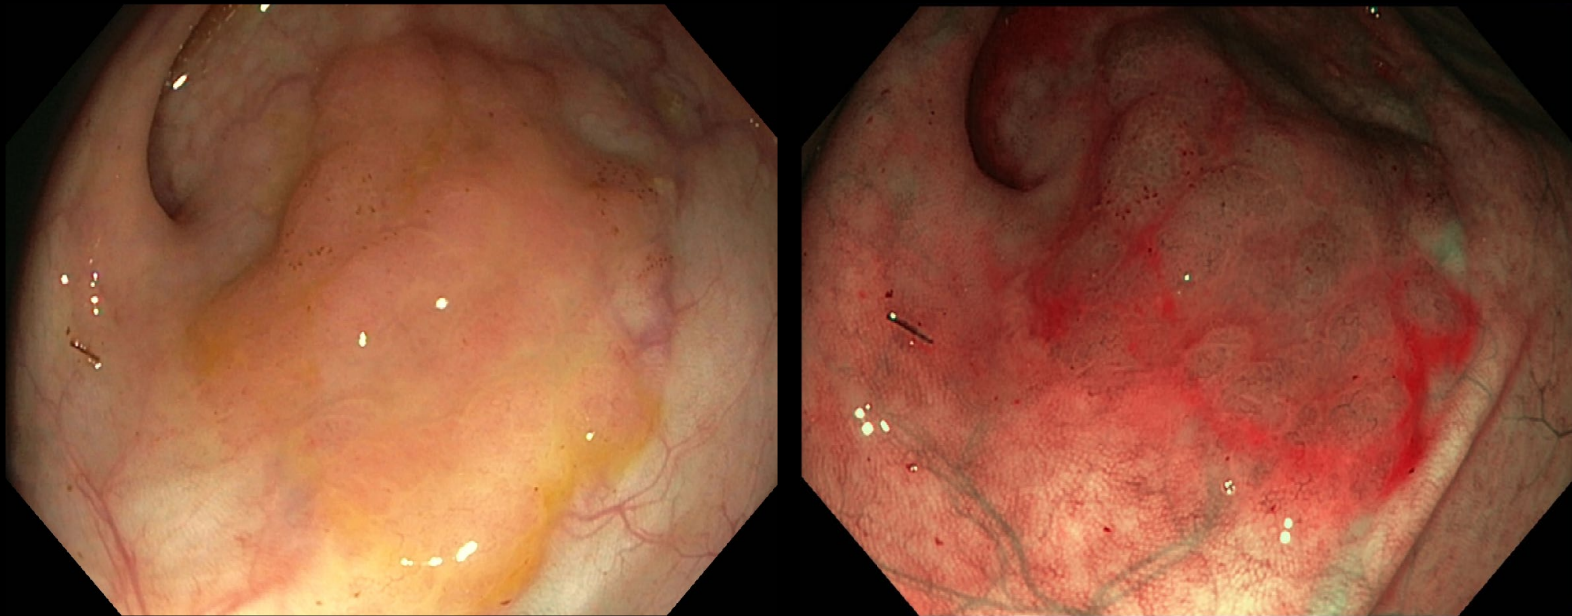

NHS BCSP Endosc Qual Assurance group 2011



# Adequate withdrawal time

- Longer withdrawal time results in higher detection of SP

ORIGINAL ARTICLE: Clinical Endoscopy

## Differences in proximal serrated polyp detection among endoscopists are associated with variability in withdrawal time CME

Thomas R. de Wijkerslooth, MD,<sup>1</sup> Esther M. Stoop, MD,<sup>2</sup> Patrick M. Bossuyt, PhD,<sup>3</sup>  
Kristien M.A.J. Tytgat, MD, PhD,<sup>1</sup> Jan Dees, MD,<sup>2</sup> Elisabeth M.H. Mathus-Vliegen, MD, PhD,<sup>1</sup>  
Ernst J. Kuipers, MD, PhD,<sup>2</sup> Paul Fockens, MD, PhD,<sup>1</sup> Monique E. van Leerdam, MD, PhD,<sup>2</sup>  
Evelien Dekker, MD, PhD<sup>1</sup>

Rotterdam, Amsterdam, The Netherlands

# Role of advanced imaging in SP detection

---

- Narrow Band Imaging (NBI) has no proven additional value in SP detection in SPS patients
- Chromoendoscopy (CE) probably usefull but time consuming
- Advanced imaging usefull to detect SPs in case of uncertainty!

Hazewinkel et al. GIE 2014

Fu et al. Int J Clin Exp Pathol. 2014

# Narrow Band Imaging

---

HRE

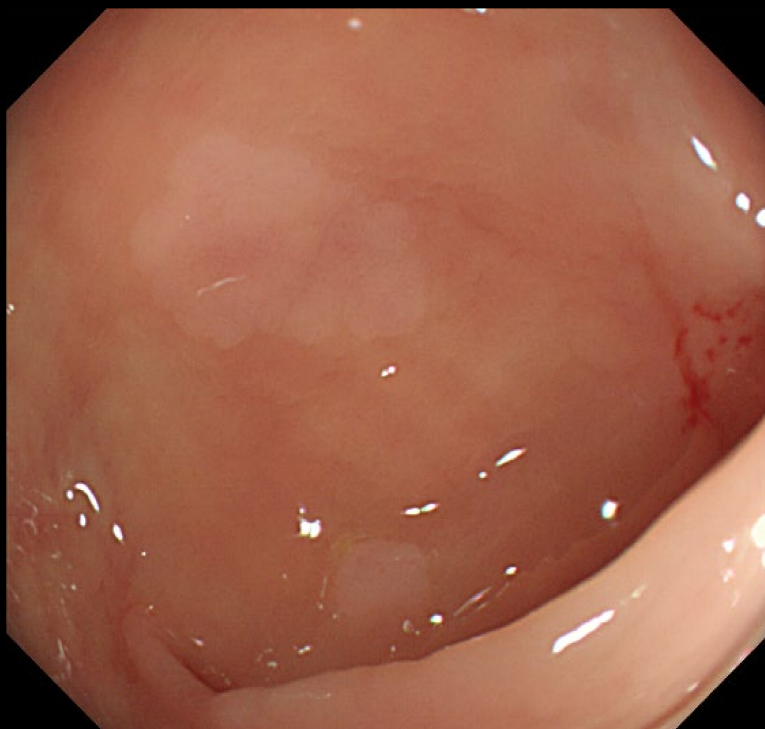

NBI

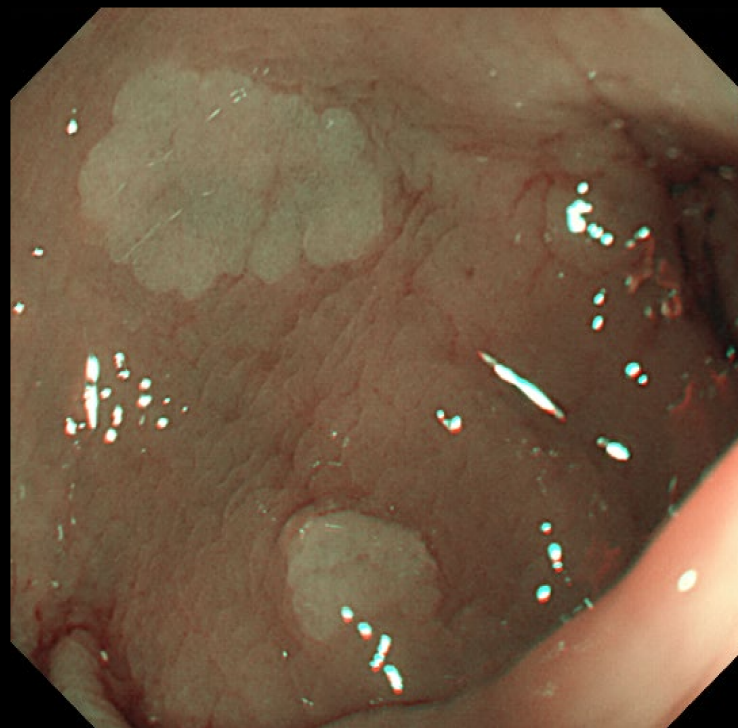

# Narrow Band Imaging

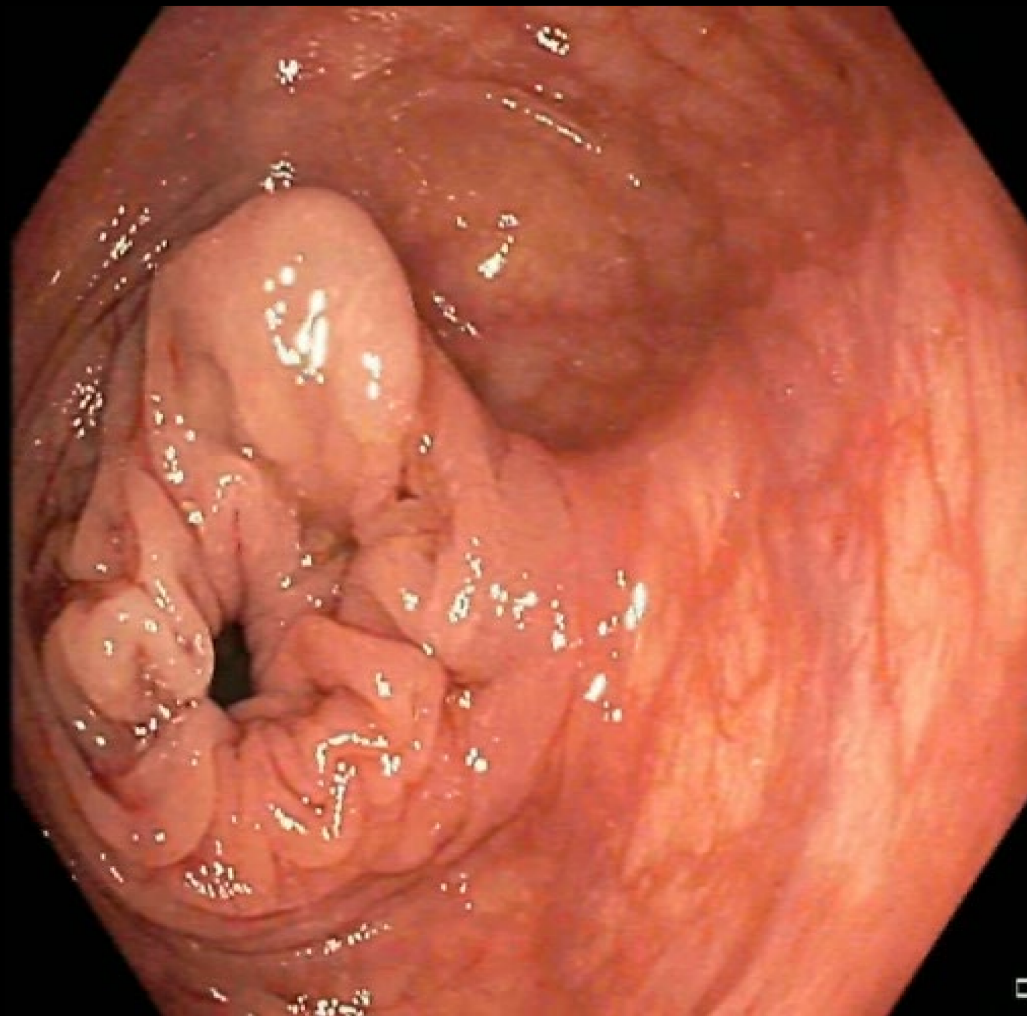

# Conclusion

---

- SPs are easily missed during colonoscopy
- Important reason for right-sided interval CRC
- SP detection can be improved by:
  - Awareness of malignant potential SPs
  - Knowledge of subtle SP features
  - High quality colonoscopy
  - Targeted use of advanced imaging techniques
