# Supplementary material for: Substantial and sustained improvement of serrated polyp detection after a simple educational intervention: results from a prospective controlled trial
Source: PubMed Central journal article supplement (PMC7677479; doi:10.1136/gutjnl-2019-319804), 2020-03-05
Supplement: gutjnl-2019-319804supp002.pdf [file gutjnl-2019-319804supp002.pdf]

**Supplementary table 1 – Sensitivity analysis including endoscopists present during only one of the two training sessions.**

|                                                    | <b>Untrained endoscopists<br/>(control group)</b> | <b>Trained endoscopists,<br/>attended both training<br/>sessions</b> | <b>Trained endoscopists,<br/>attended only one training<br/>session</b> |
|----------------------------------------------------|---------------------------------------------------|----------------------------------------------------------------------|-------------------------------------------------------------------------|
| <b>Number of endoscopists</b>                      | 100                                               | 17                                                                   | 11                                                                      |
| <b>Number of colonoscopies</b>                     |                                                   |                                                                      |                                                                         |
| Baseline                                           | 6,069                                             | 928                                                                  | 349                                                                     |
| Post-training *                                    | 44,967                                            | 10,377                                                               | 3464                                                                    |
| <b>Baseline PSPDR</b>                              | 9.3% (8.6-10%)                                    | 9.3% (7.4-11%)                                                       | 10.6% (7.6-14%)                                                         |
| <b>Post-training PSPDR*</b>                        | 10.2% (10.0-10.5%)                                | 13.8% (13.2-14.5)                                                    | 12.8% (12-14%)                                                          |
| <b>OR for detection of <math>\geq 1</math> PSP</b> | 1.00 (reference)                                  | 1.49 (1.08-2.06)                                                     | 1.37 (0.91-2.06)                                                        |

\*This represents colonoscopies performed in 2015 onwards (control endoscopists), or colonoscopies performed after first attended training session.
