# Supplementary material for: Substantial and sustained improvement of serrated polyp detection after a simple educational intervention: results from a prospective controlled trial
Source: PubMed Central journal article supplement (PMC7677479; doi:10.1136/gutjnl-2019-319804), 2020-03-05

Schematic overview of invitations based on to birth year

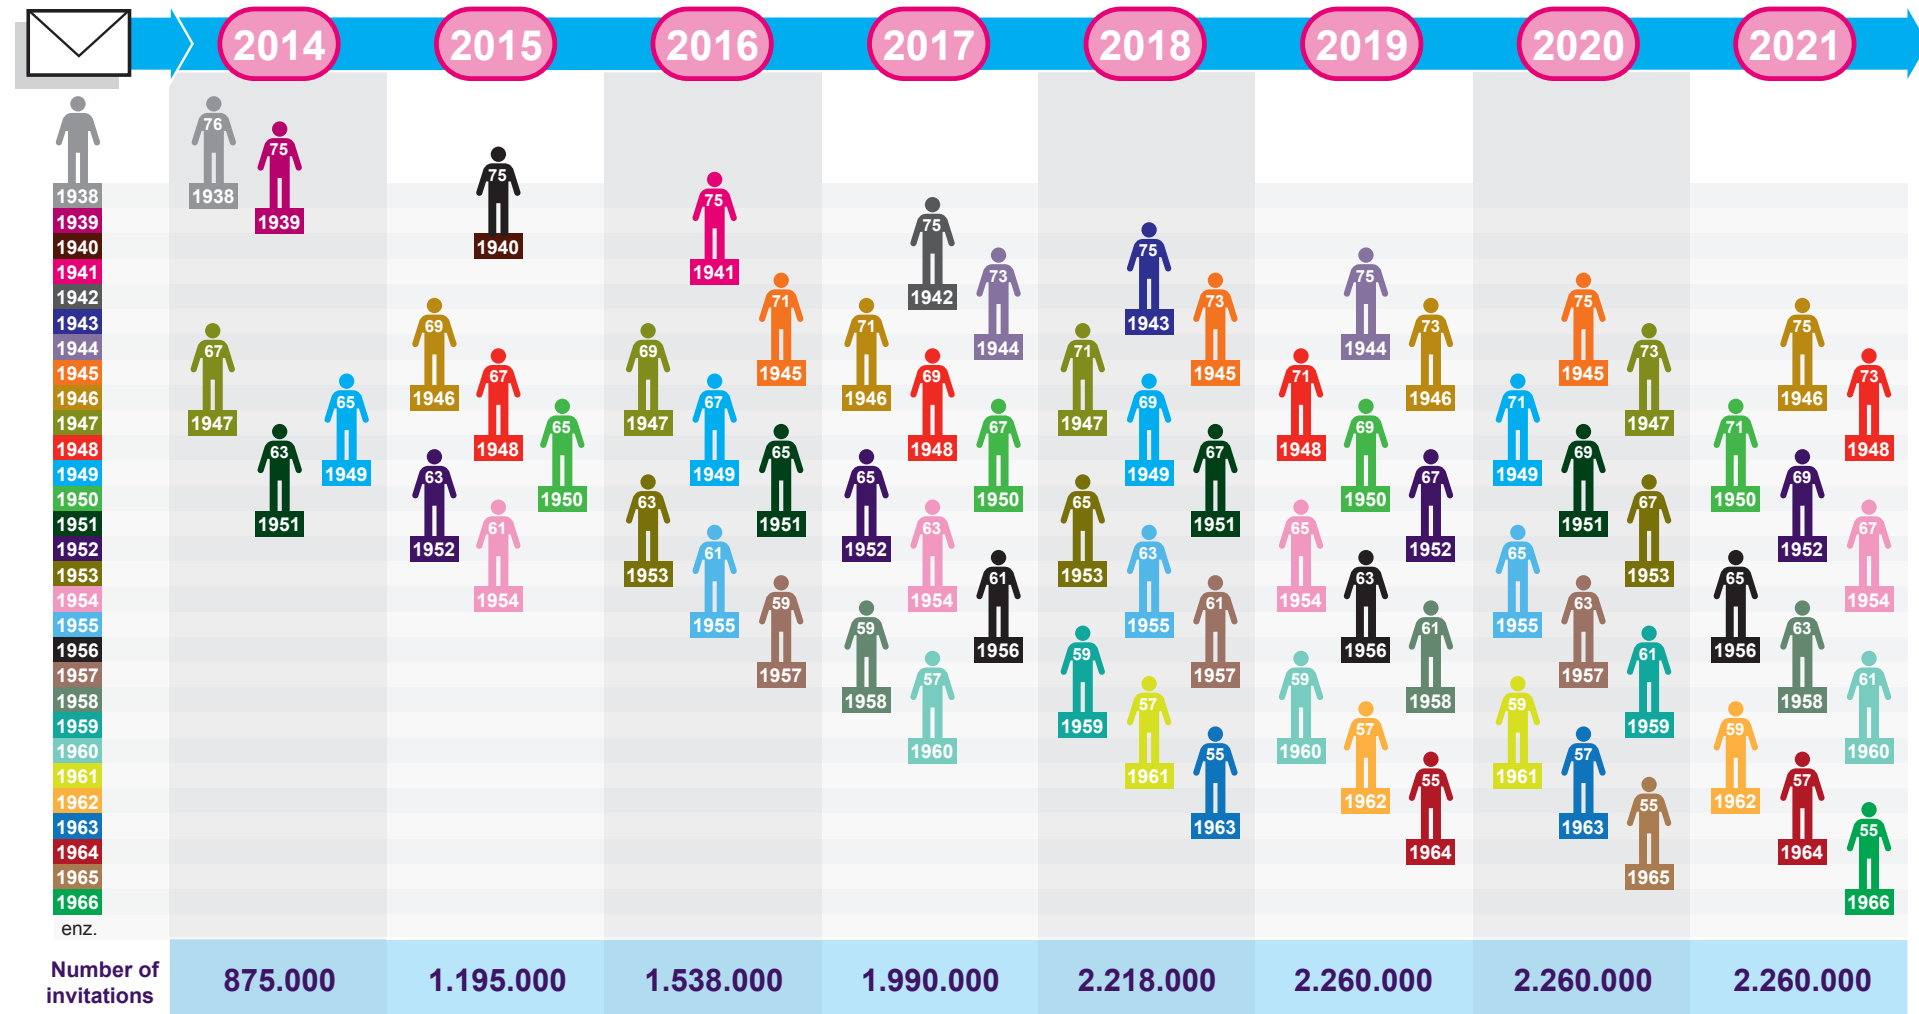

Supplement: gutjnl-2019-319804supp003.pdf [file gutjnl-2019-319804supp003.pdf]
